# Supplementary material for: Transcriptome profiling of nla-mutant Arabidopsis reveals possible post-translational regulation of key factors cross-linking circadian-rhythm and anthocyanin pathways under boron toxicity
Source: Research Square preprint supplement (doi:10.21203/rs.3.rs-7334872/v1), 2025-09-17
Supplement: Supplementary file 1 [file bb617ef9762c856b6d4523bf.docx]

Table S1a: Expression levels of *NLA* gene under B toxicity condition in *Arabidopsis thaliana*

|  | C | 1B | 3B |
| --- | --- | --- | --- |
| Exression level | 1.04±0.28 | 1.6±0.05 | 4.2±0.6 |

Table S1b: primer list

| **NLA-F** | TGATGGCTTGAAAACCGCAG |
| --- | --- |
| **NLA-R** | CAATAGTCTCTGCAGCTTCGC |
| **PHO2-F** | ACCGTTTCTCATCAAGGCGT |
| **PHO2-R** | GTGCCCGTCCACCATAAGAA |
| **NRT1.7-F** | CGCCACTCTCCTCGGACTAA |
| **NRT1.7-R** | CTGTTGCATGATGCTGGGTG |
| **PHT1;1-F** | AGTGTACGGTCTCACTTTGGTAA |
| **PHT1;1-R** | CCAAATCCCAACCAAAACCTGAA |
| **PHT1;4-F** | AGATCCCACATAAACTTTCTAGGAG |
| **PHT1;4-R** | AGAATCCCATTCCGGCGATT |

Figure S1a. Quantitative real-time polymerase chain reaction (qRT-PCR) of randomly selected genes.


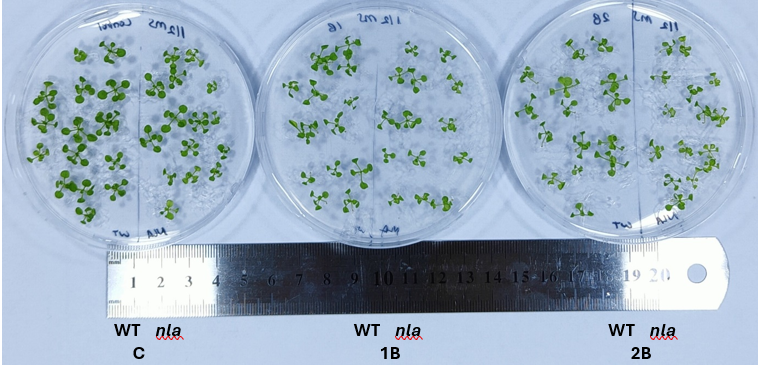


Figure S1b. Phenotypical view of *nla* mutant and WT *Arabidopsis thaliana* plants grown under C, 1B and 2B conditions for 2 weeks.


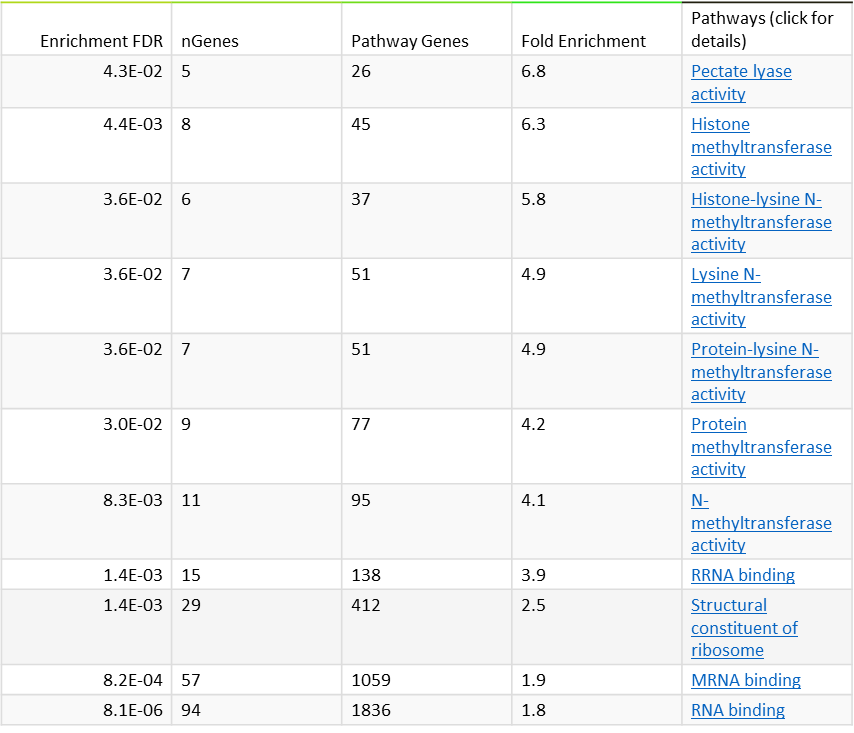


Figure S2. GO Molecular function analysis of upregulated genes in *nla* under C condition compared to WT-C


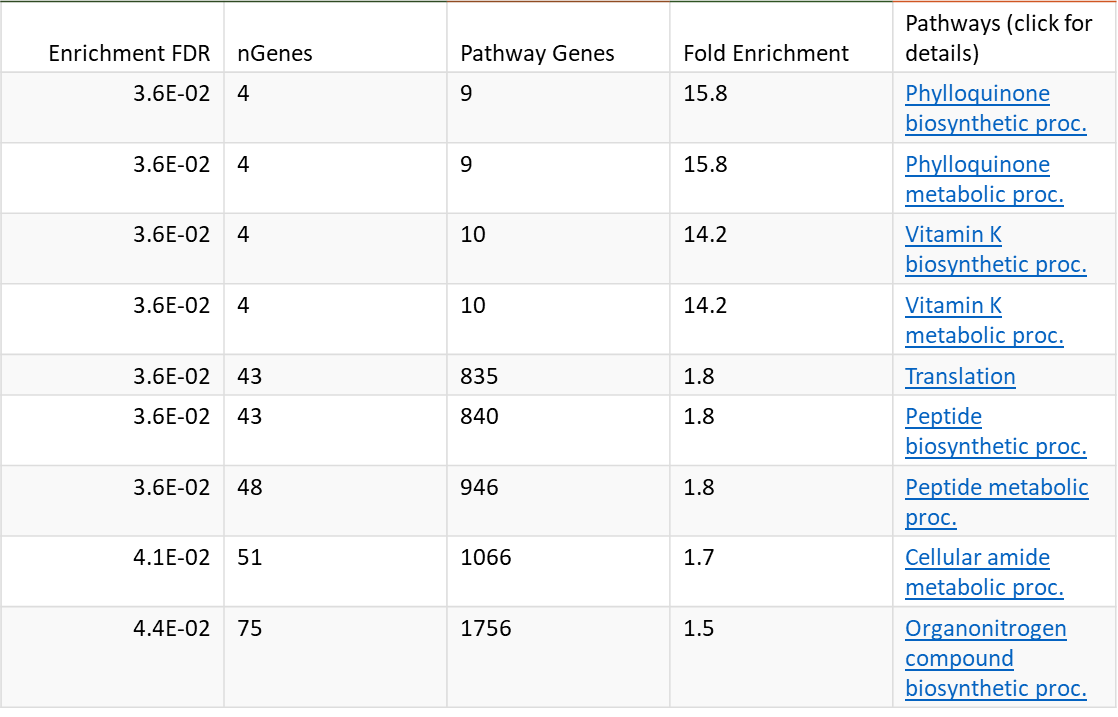


Figure S3. GO Biological process analysis of upregulated genes in *nla* under C condition compared to WT-C


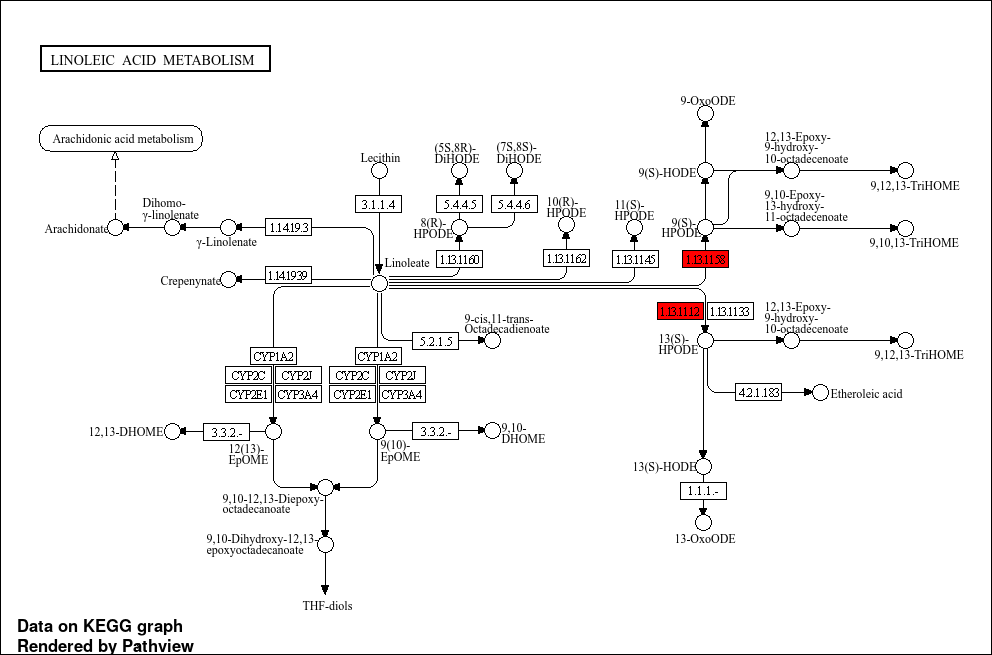


Figure S4. DEGs in linoleic acid metabolism pathway downregulated in *nla* under C condition compared to WT-C


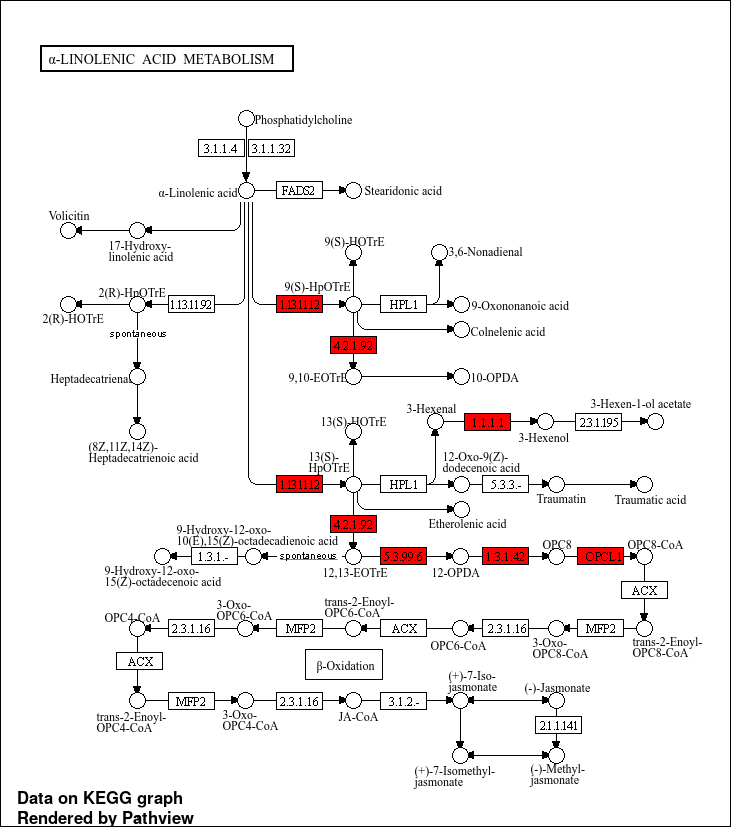


Figure S5. DEGs in alpha linolenic acid metabolism pathway downregulated in *nla* under C condition compared to WT-C


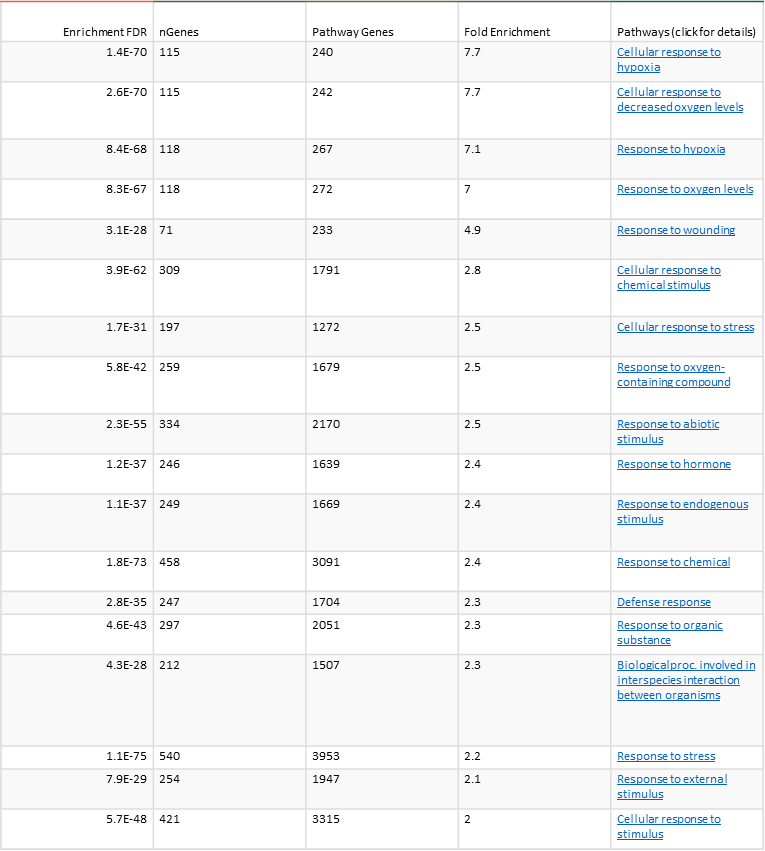


Figure S4. GO Biological process analysis of downregulated genes in *nla* under C condition compared to WT-C


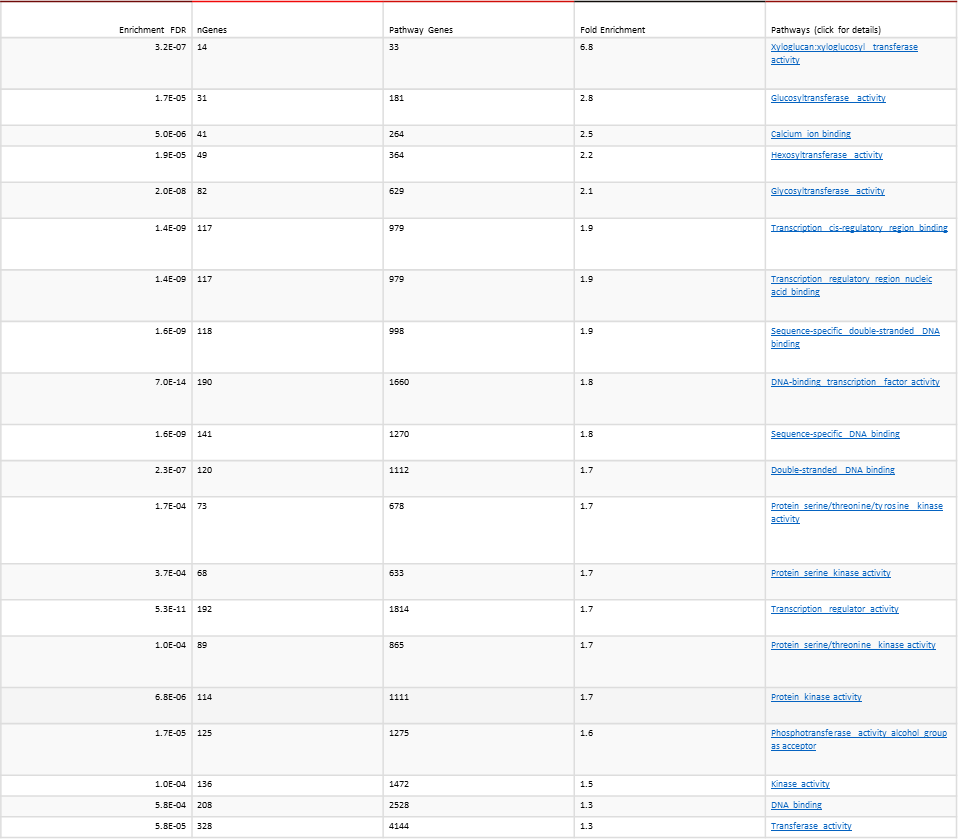


Figure S5. GO Molecular function analysis of downregulated genes in *nla* under C condition compared to WT-C


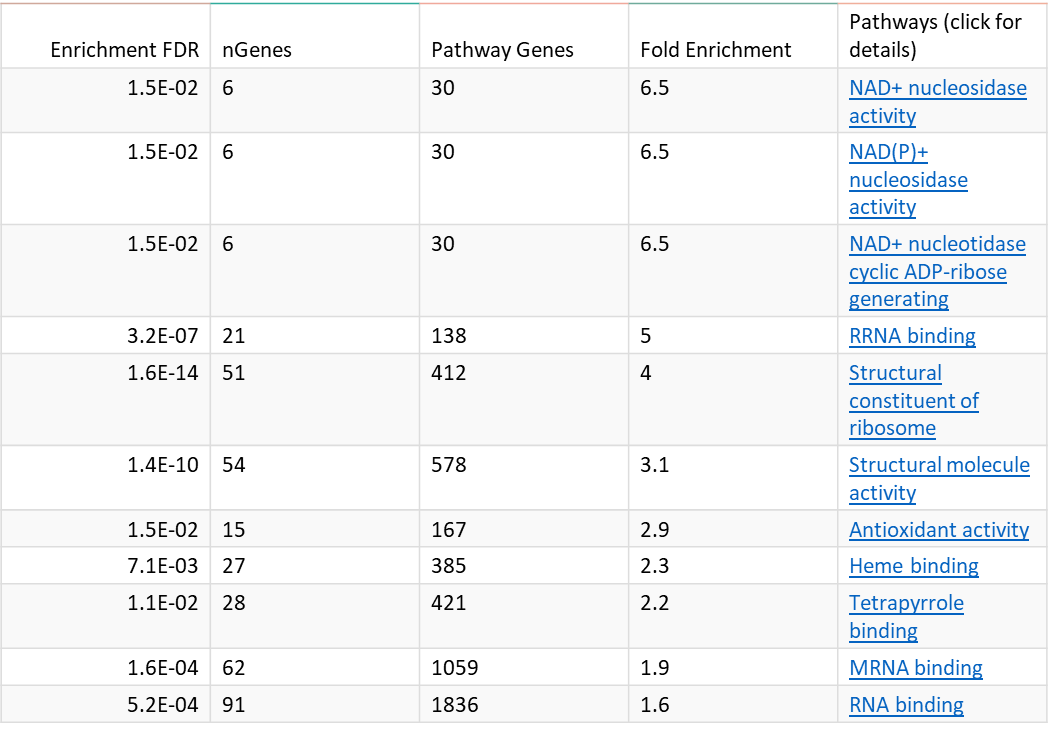


Figure S6. GO Molecular function analysis of upregulated genes in *nla* under 1B condition compared to WT-C


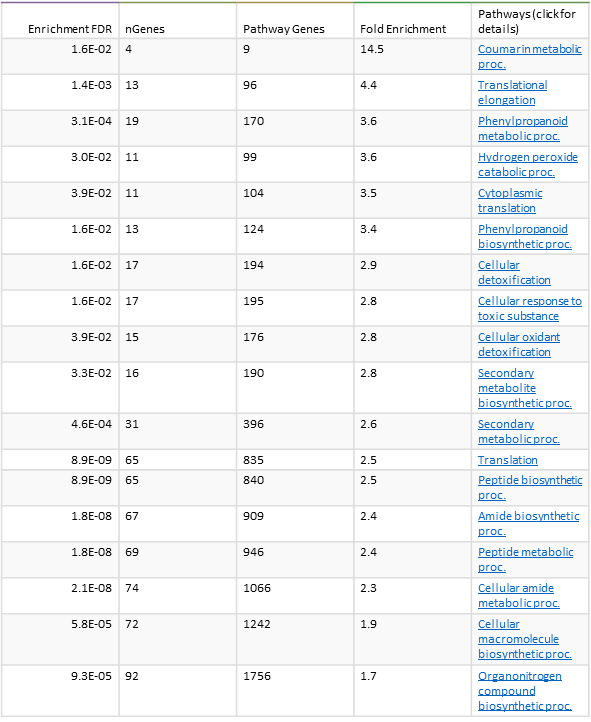


Figure S7. GO Biological process analysis of upregulated genes in *nla* under 1B condition compared to WT-C


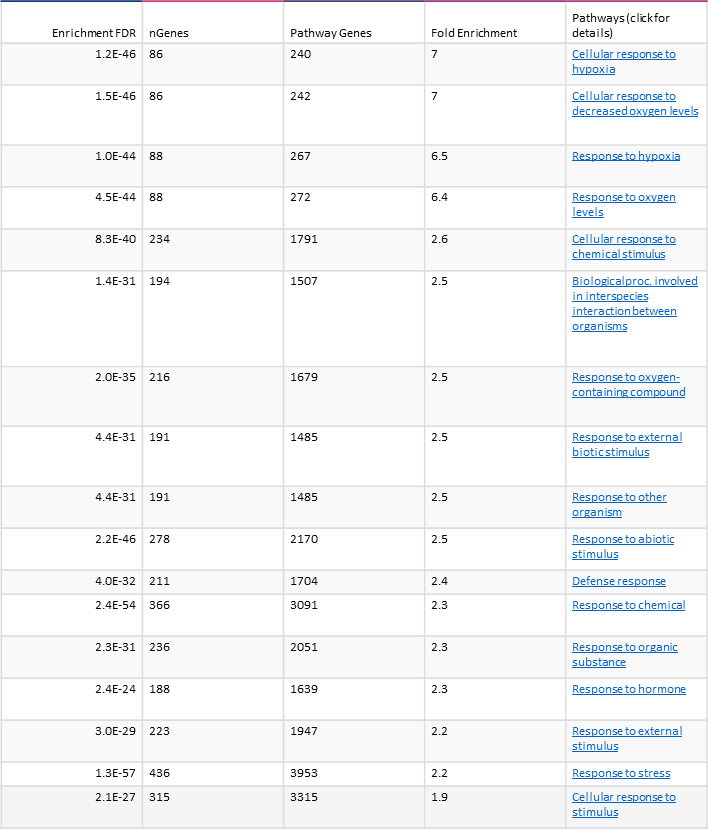


Figure S8. GO Biological process analysis of downregulated genes in *nla* under 1B condition compared to WT-C


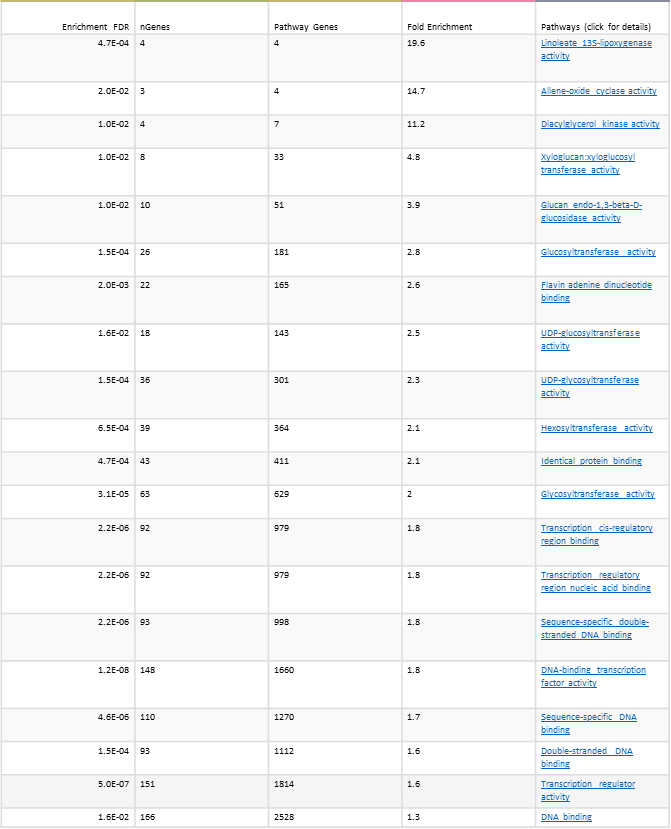


Figure S9. GO Molecular function analysis of downregulated genes in *nla* under 1B condition compared to WT-C


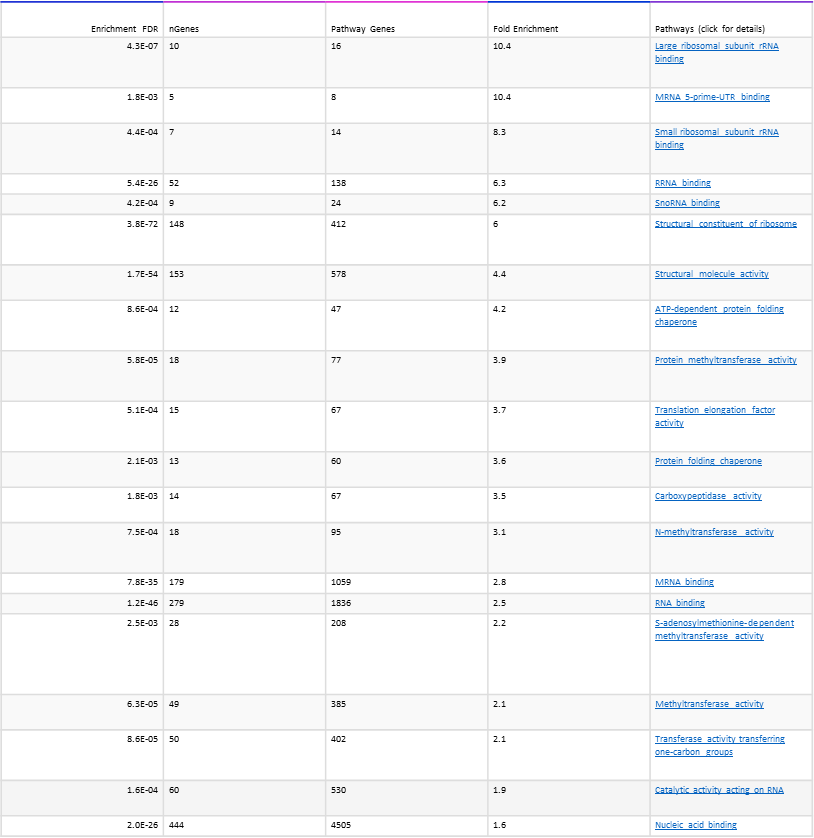


Figure S10. GO Molecular function analysis of upregulated genes in *nla* under 2B condition compared to WT-C


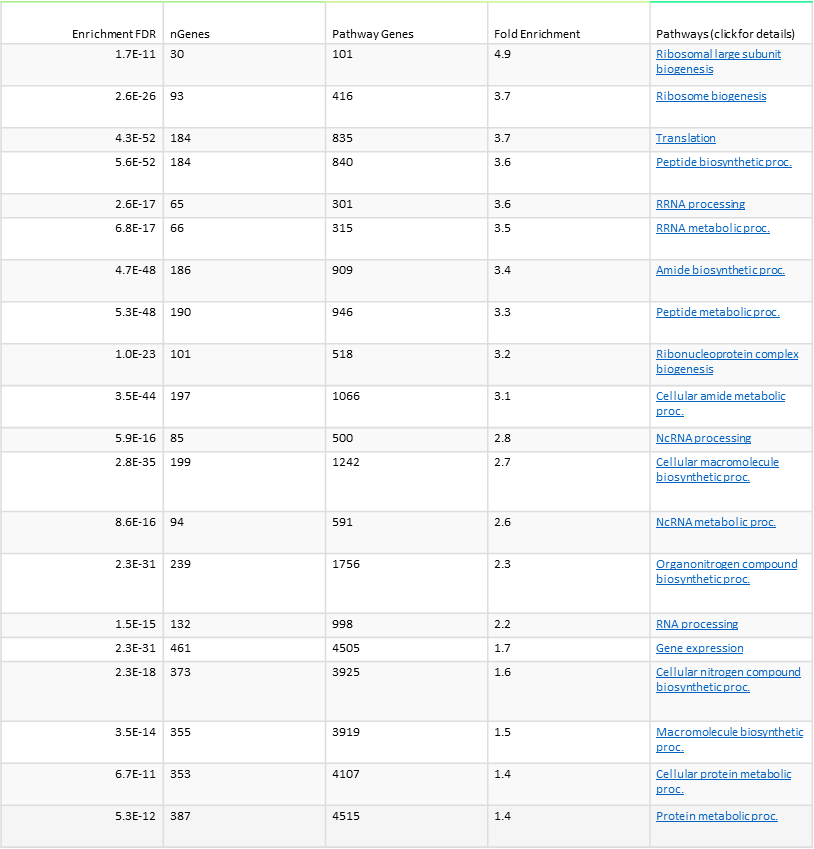


Figure S11. GO Biological process analysis of upregulated genes in *nla* under 2B condition compared to WT-C


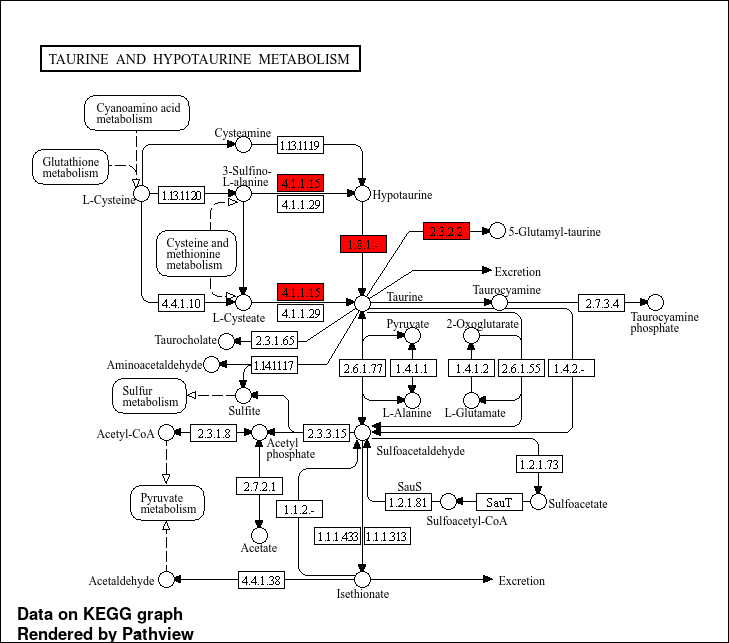


Figure S12. DEGs in taurine and hypotaurine metabolism pathway downregulated in *nla* under 2B condition compared to WT-C


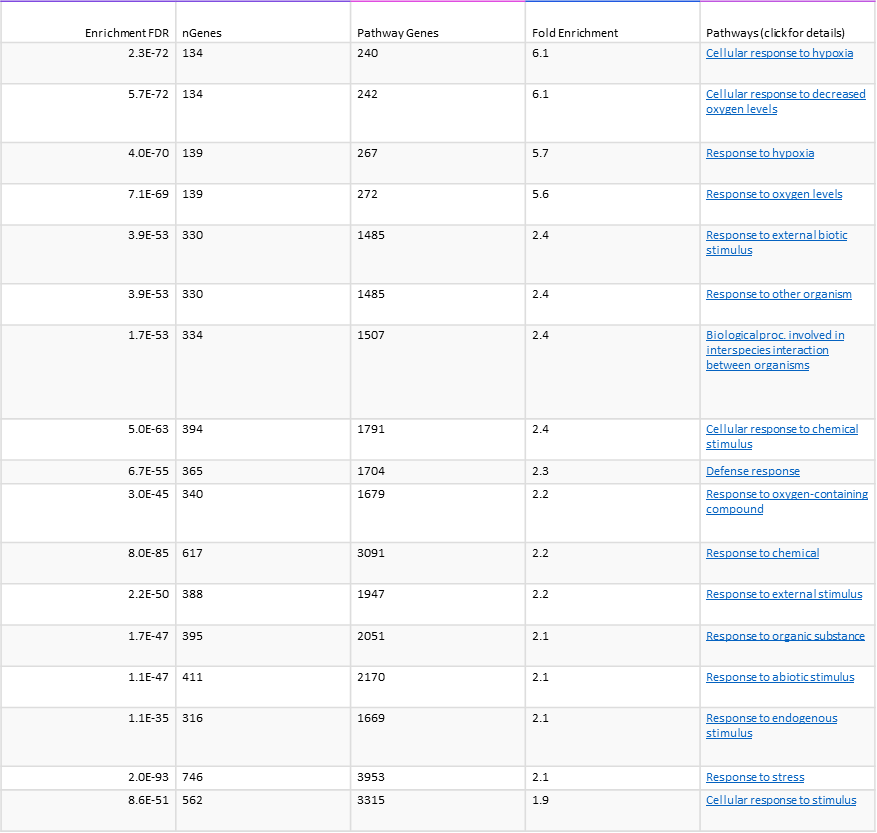


Figure S13. GO Biological process analysis of downregulated genes in *nla* under 2B condition compared to WT-C


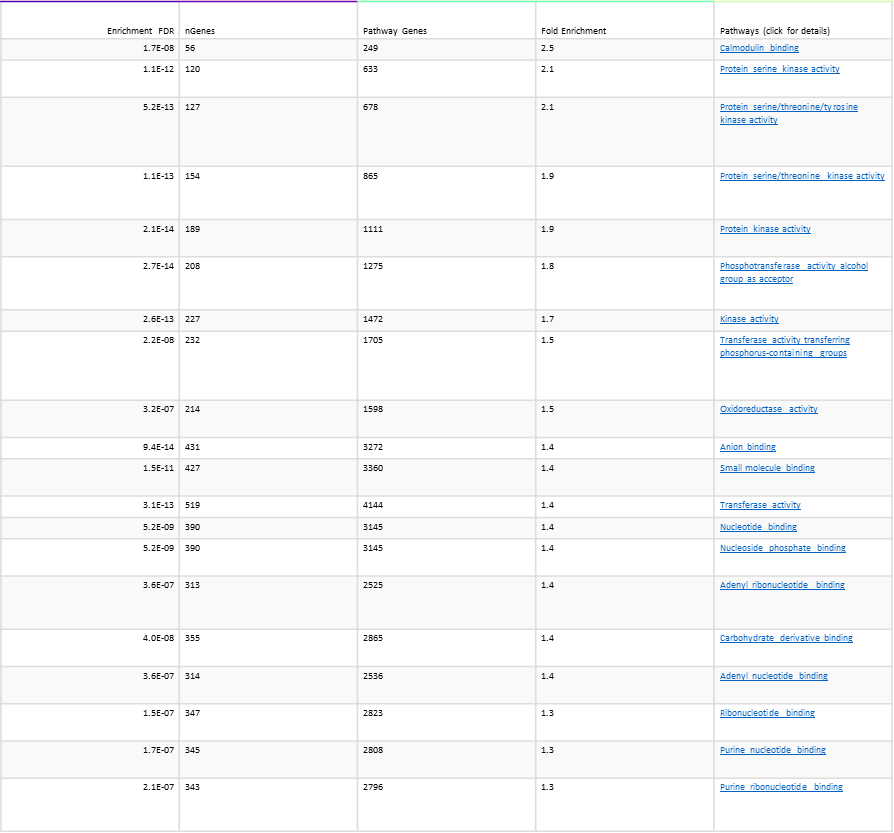


Figure S14. GO Molecular function analysis of downregulated genes in *nla* under 2B condition compared to WT-C


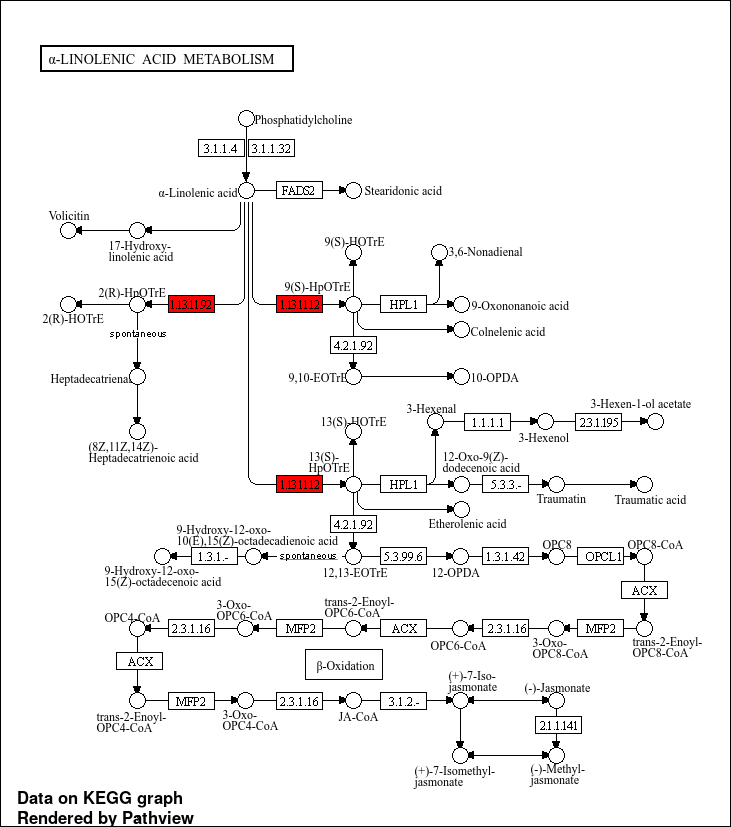


Figure S15. DEGs in alpha linolenic acid metabolism pathway upregulated in *nla* under 1B condition compared to nla-C


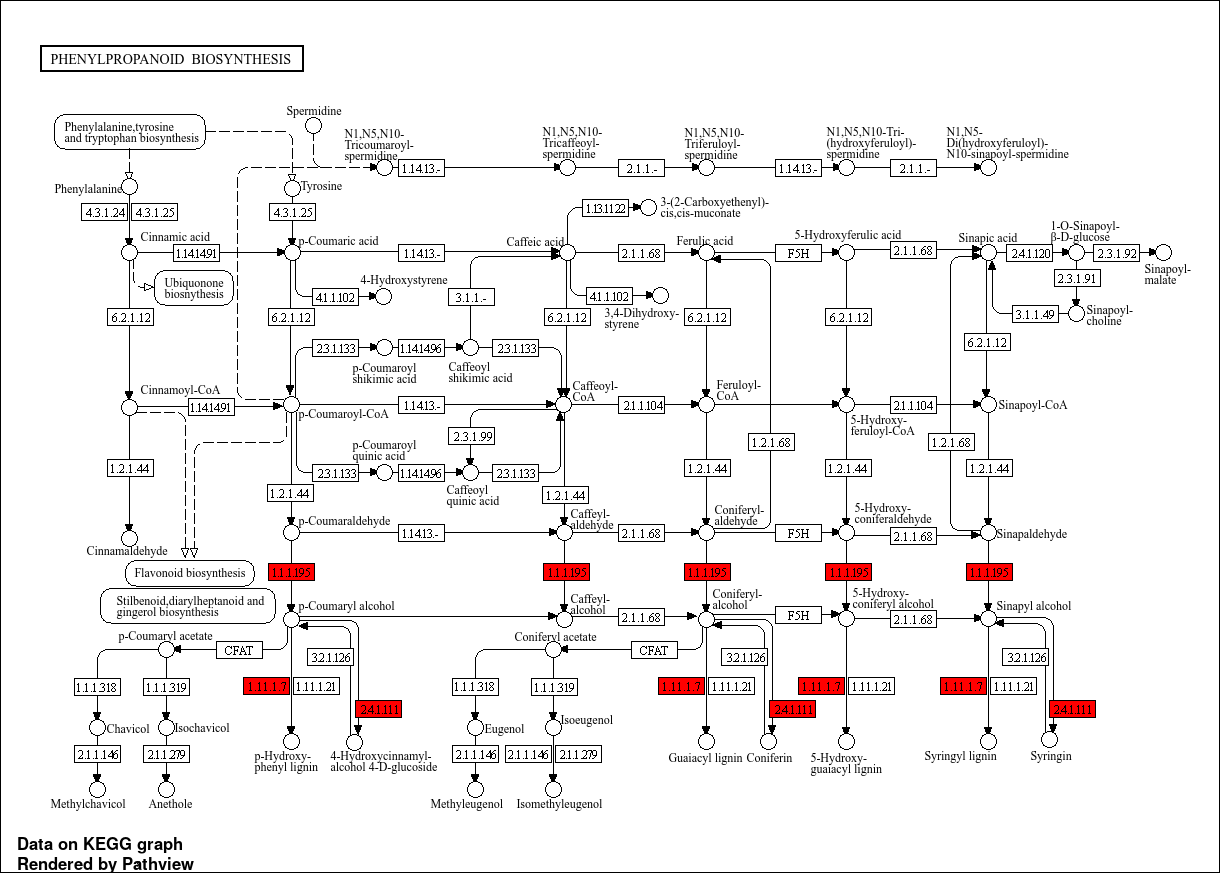


Figure S16. DEGs in phenylpropanoid biosynthesis pathway upregulated in *nla* under 1B condition compared to nla-C


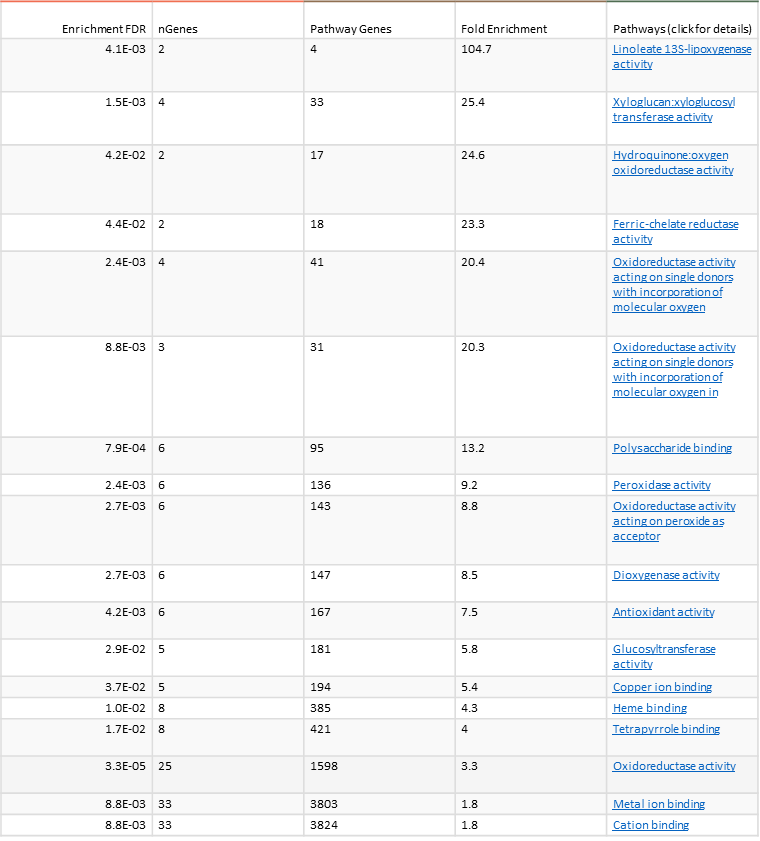


Figure S17. GO Molecular function analysis of upregulated genes in *nla* under 1B condition compared to nla-C


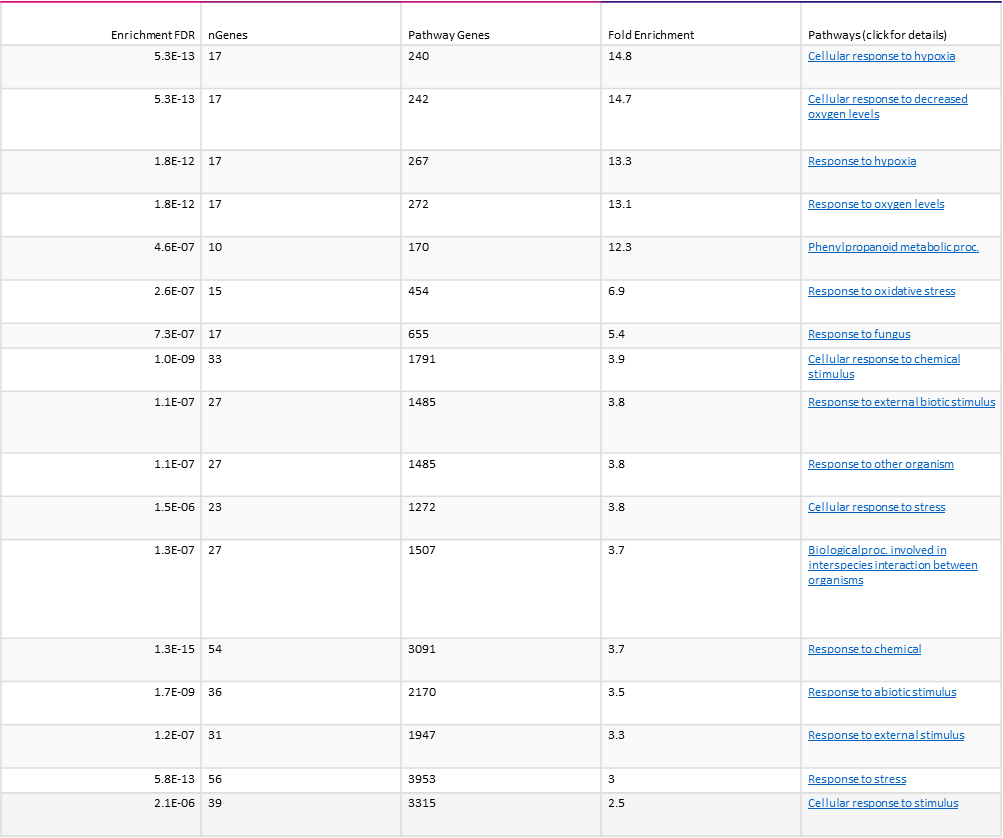


Figure S18. GO Biological process analysis of upregulated genes in *nla* under 1B condition compared to nla-C


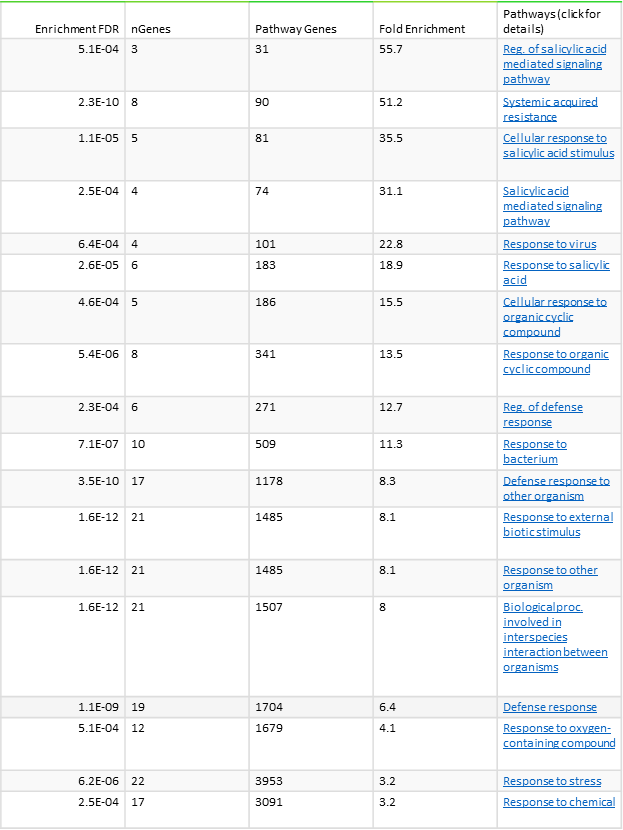


Figure S19. GO Biological process analysis of downregulated genes in *nla* under 1B condition compared to nla-C


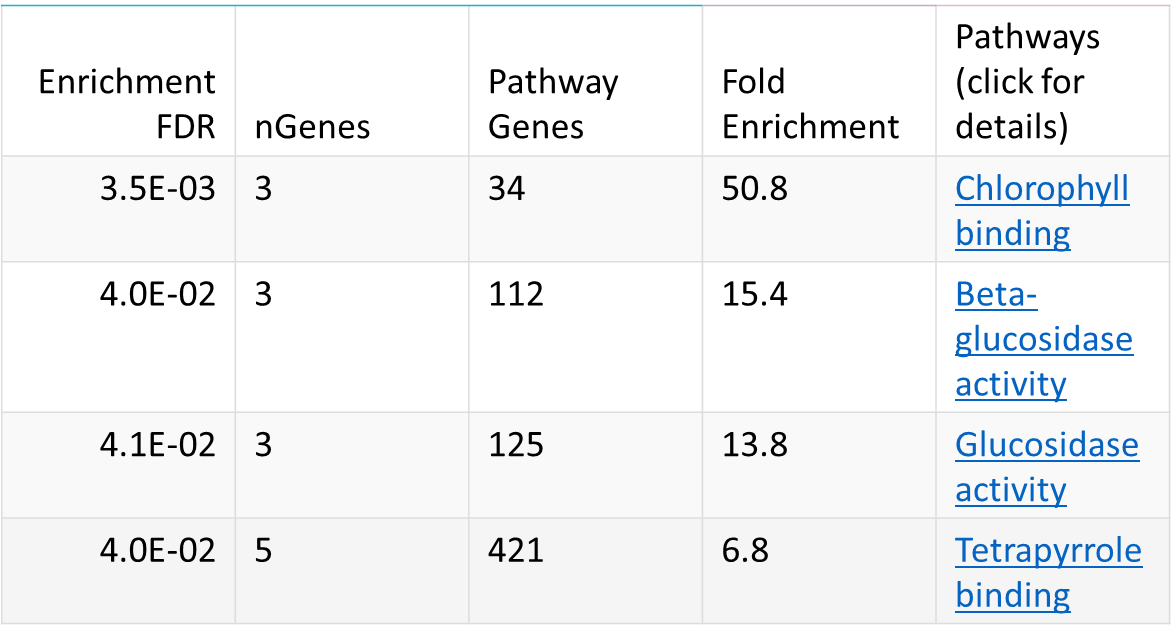


Figure S20. GO Molecular function analysis of downregulated genes in *nla* under 1B condition compared to nla-C


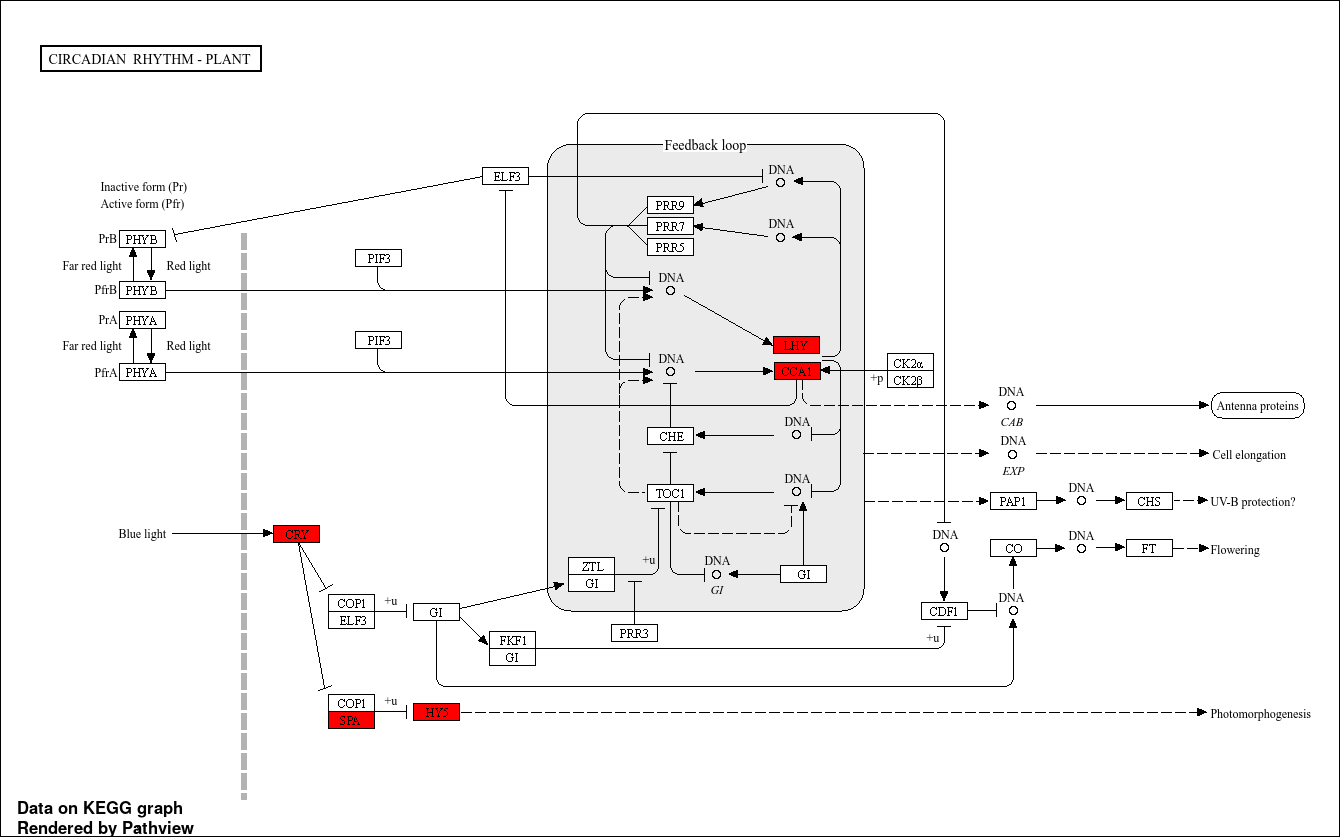


Figure S21. DEGs in circadian rhythm-plant pathway upregulated in *nla* under 2B condition compared to nla-C


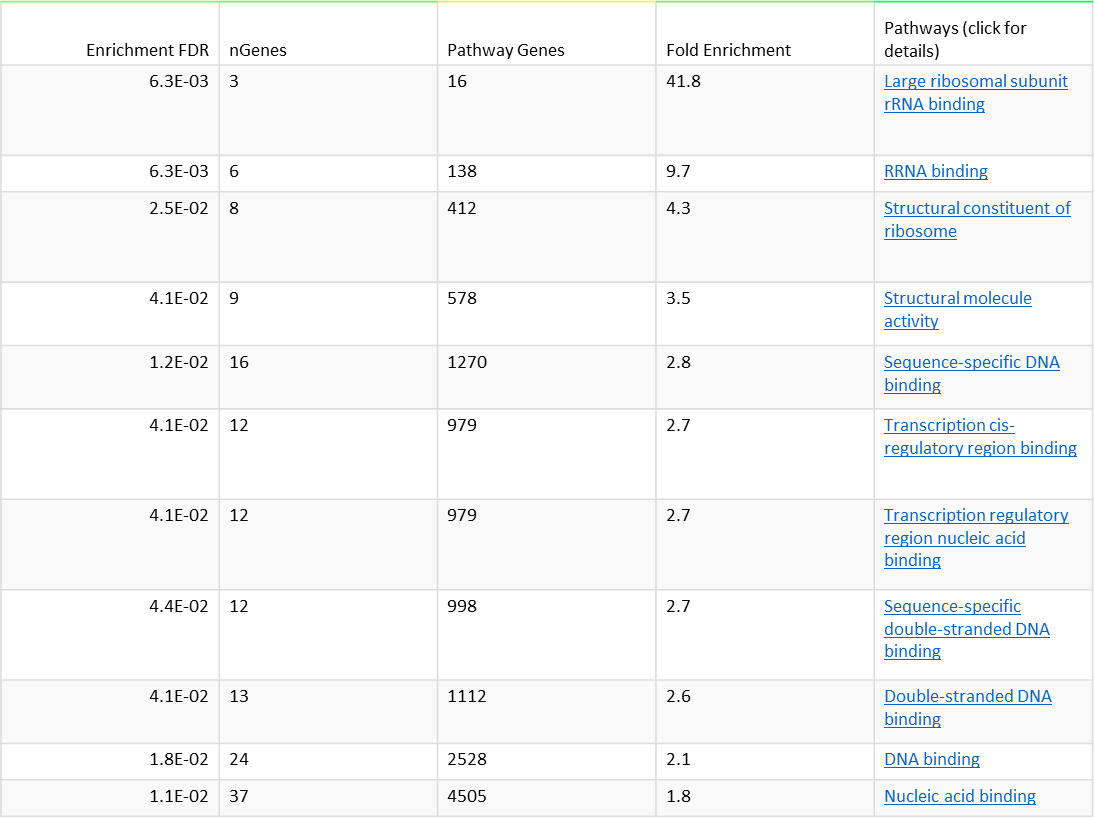


Figure S22. GO Molecular function analysis of upregulated genes in *nla* under 2B condition compared to nla-C


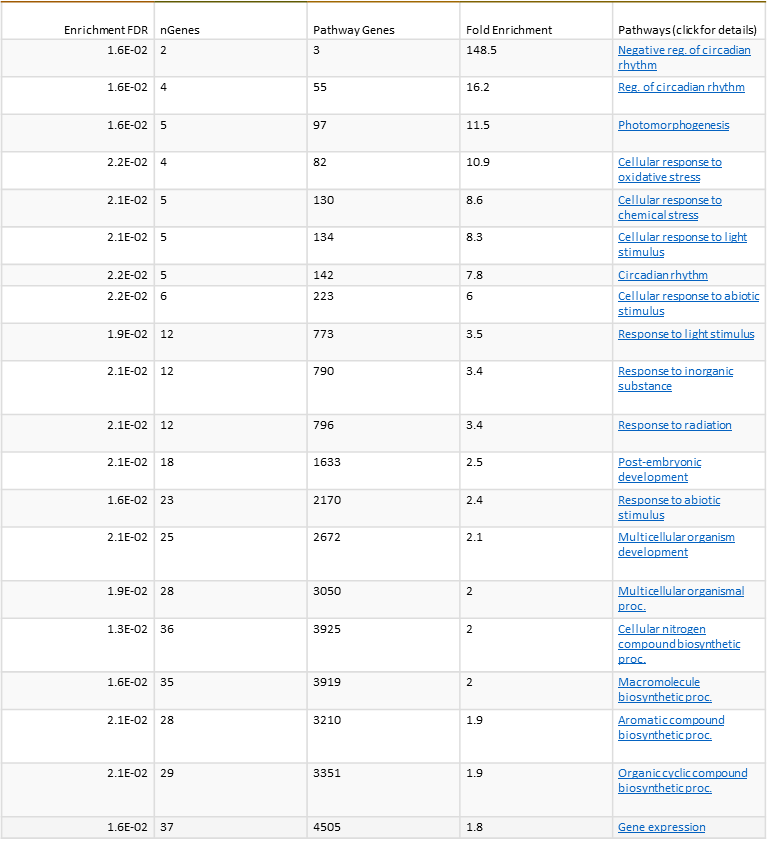


Figure S23. GO Biological process analysis of upregulated genes in *nla* under 2B condition compared to nla-C


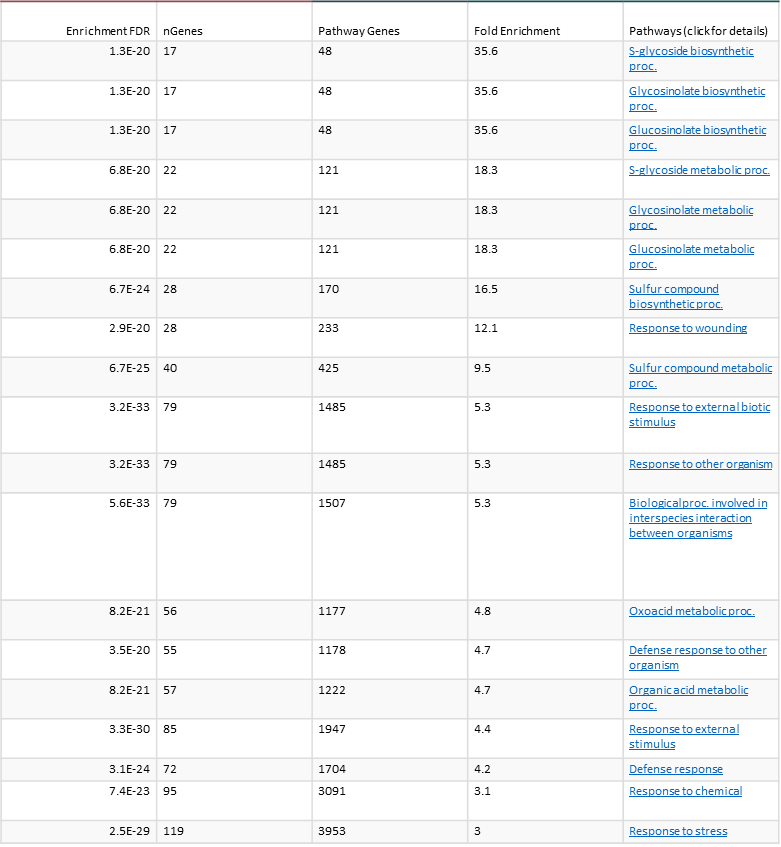


Figure S24. GO Biological process analysis of downregulated genes in *nla* under 2B condition compared to nla-C


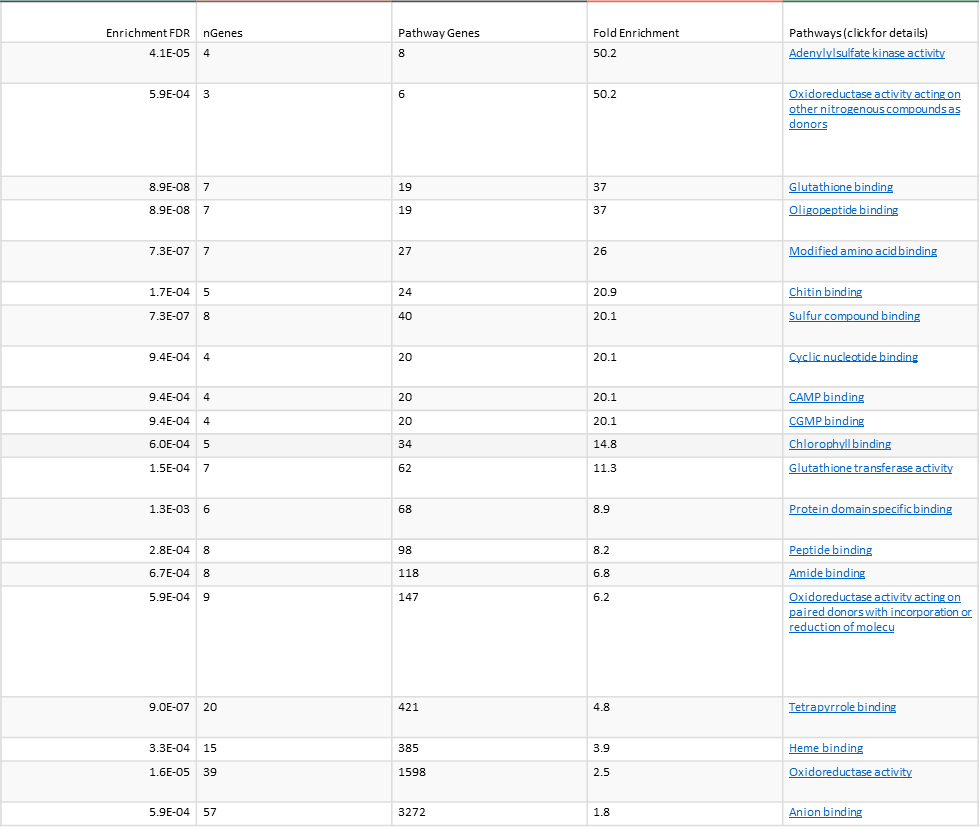


Figure S25. GO Molecular function analysis of downregulated genes in *nla* under 2B condition compared to nla-C


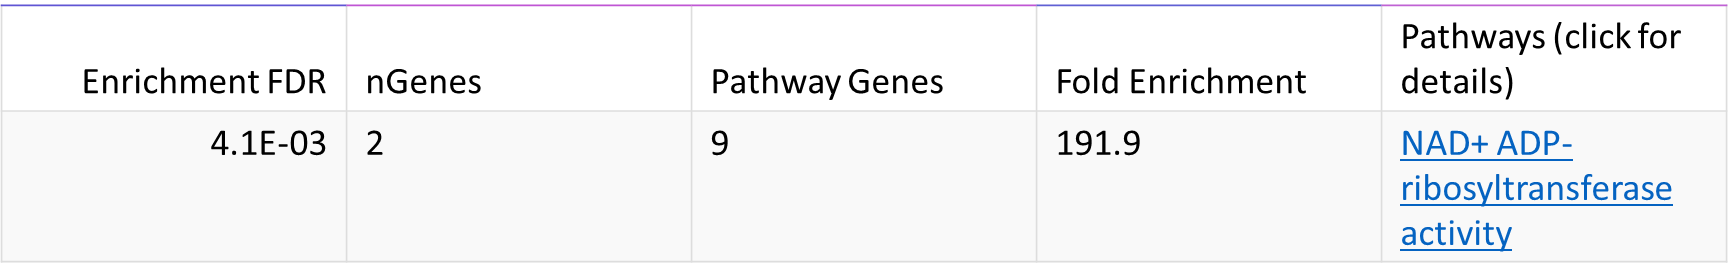


Figure S26. GO Molecular function analysis of upregulated genes in *nla* under 2B condition compared to nla-1B


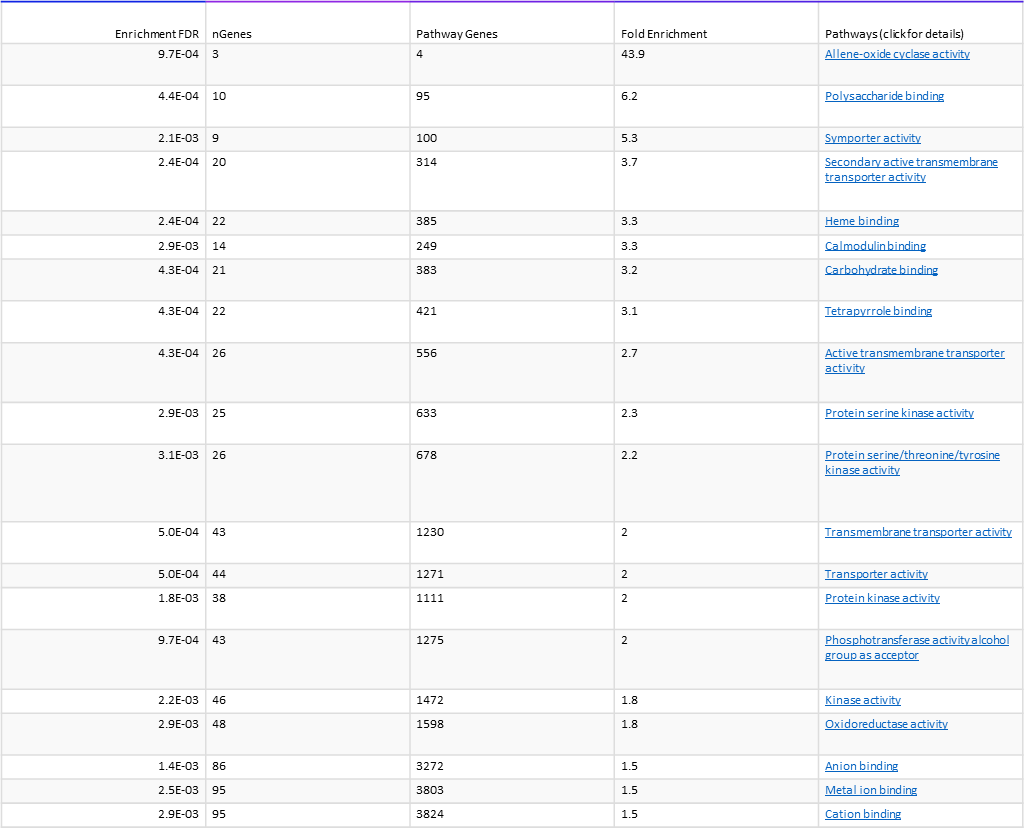


Figure S27. GO Molecular function analysis of downregulated genes in *nla* under 2B condition compared to nla-1B


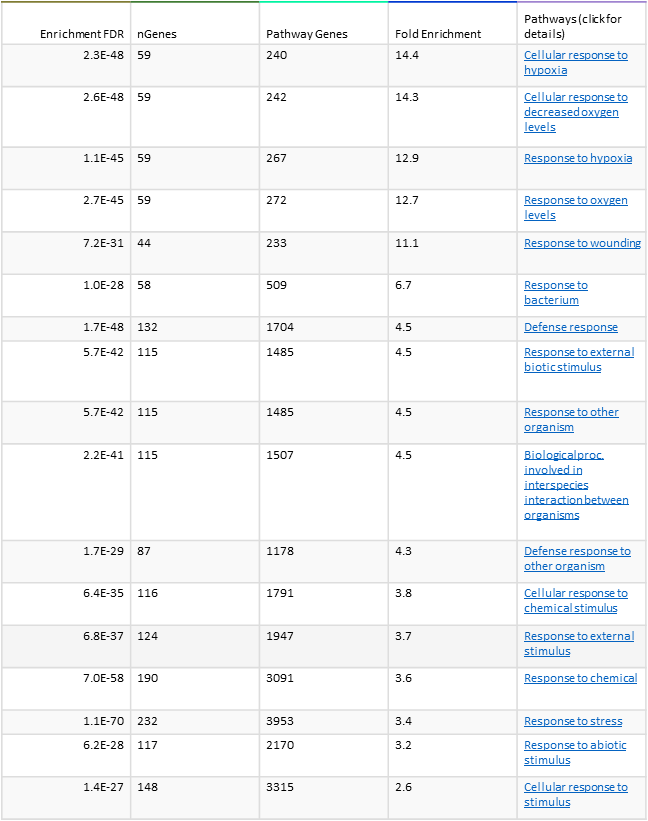


Figure S28. GO Biological process analysis of downregulated genes in *nla* under 2B condition compared to nla-1B


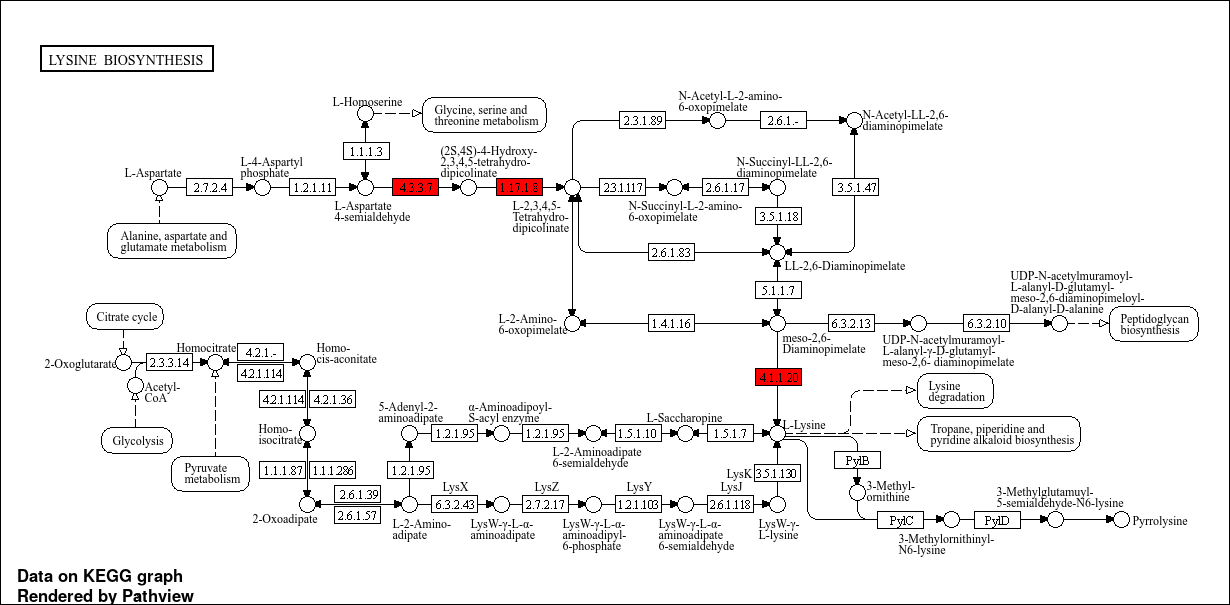


Figure S29. DEGs in lysine biosynthesis pathway specifically upregulated in *nla* under 2B condition compared to WT-C


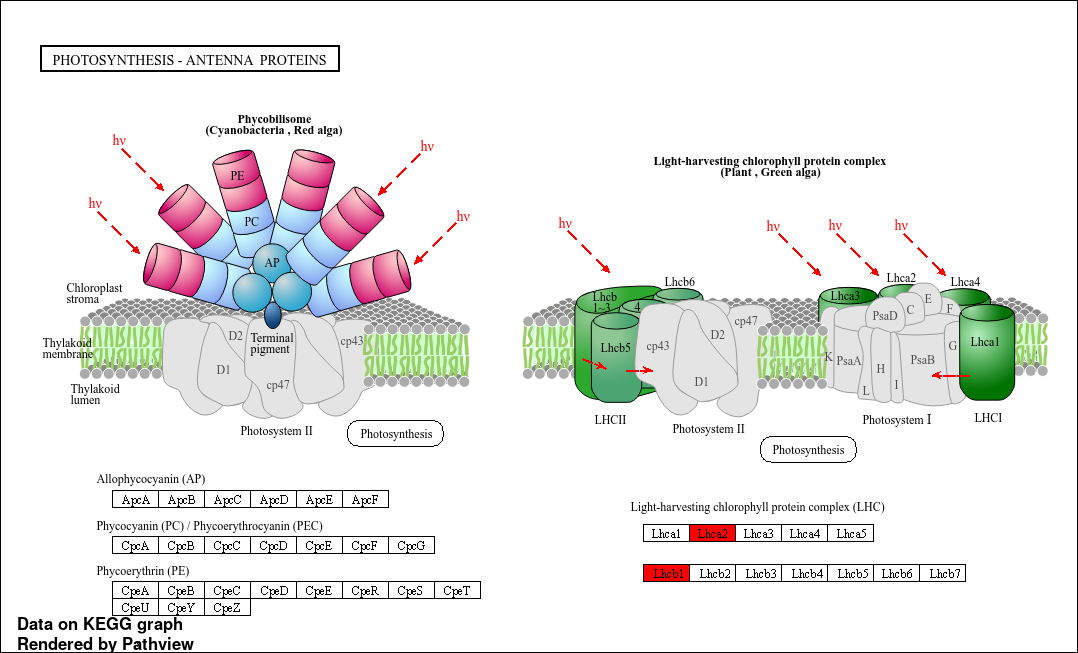


Figure S30. DEGs in photosynthesis-antenna proteins pathway commonly downregulated in *nla* plants under 1B and 2B conditions compared to nla-C


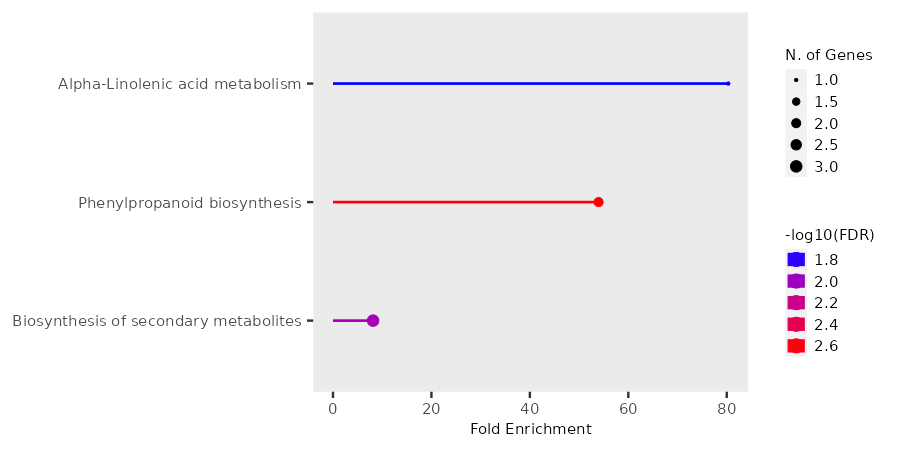


Figure S31. KEGG enrichment analysis of 8 commonly upregulated genes between *nla* under B toxicity vs WT-C and *nla* under B toxicity vs nla-C


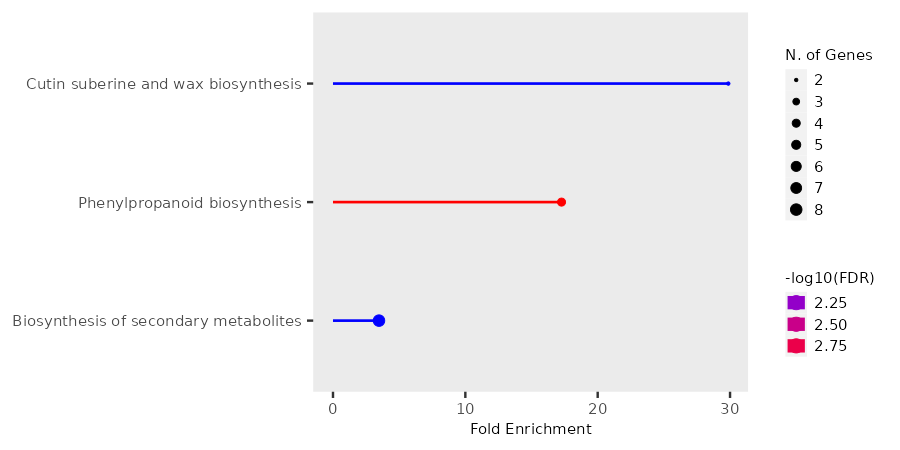


Figure S32. KEGG enrichment analysis of 50 commonly upregulated genes between *nla* under 1B vs WT-C and nla under 1B vs nla-C


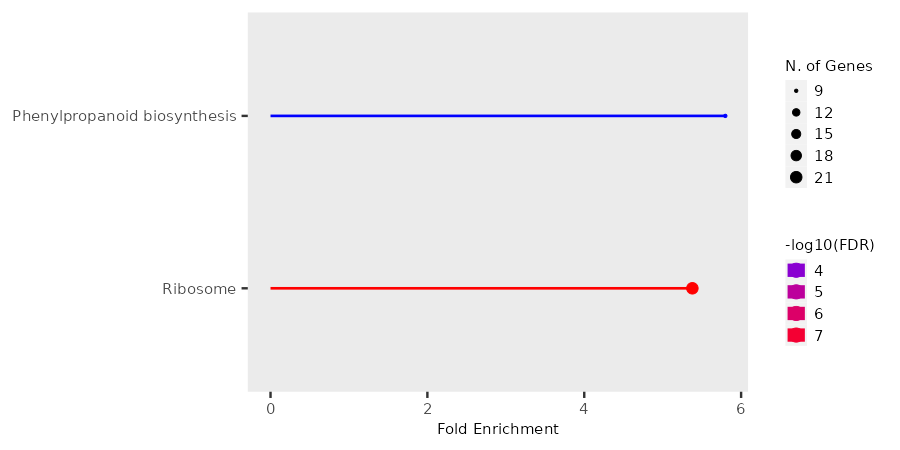


Figure S33. KEGG enrichment analysis of 345 specifically upregulated genes in *nla* under 1B vs WT-C


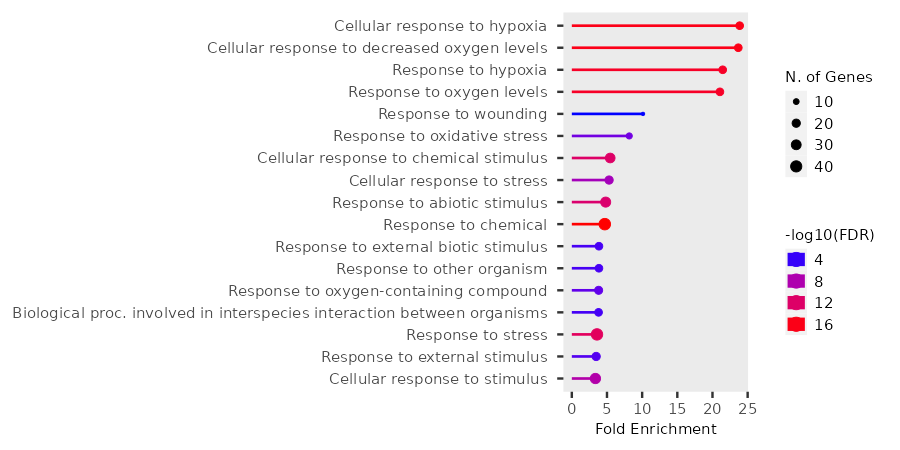


Figure S34. KEGG enrichment analysis of 82 specifically upregulated genes in *nla* under 1B vs nla-C


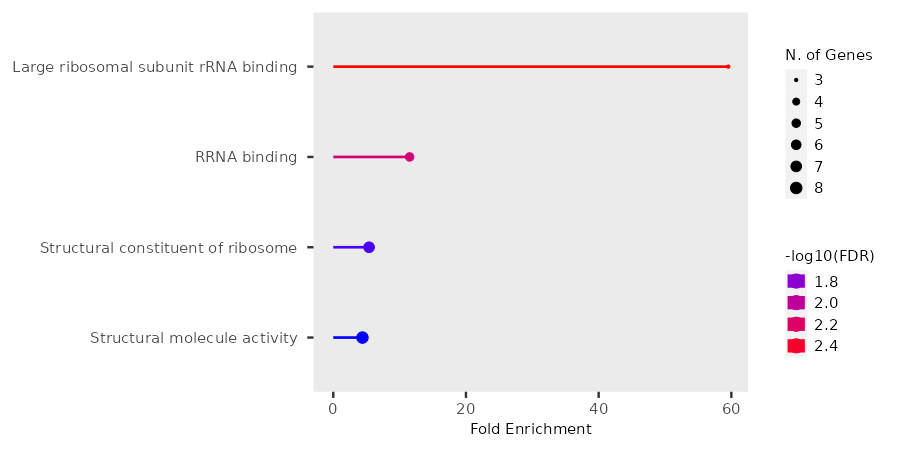


Figure S35. KEGG enrichment analysis of 89 commonly upregulated genes between *nla* under 2B vs WT-C and nla under 2B vs nla-C


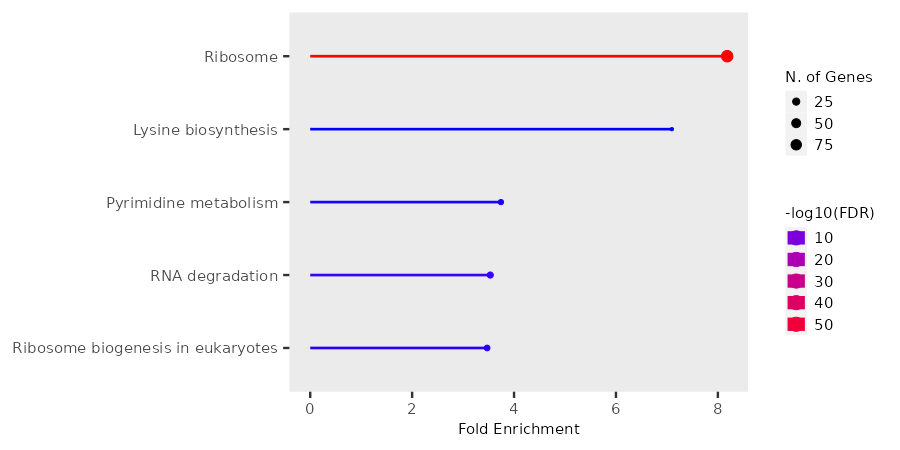


Figure S36. KEGG enrichment analysis of 1084 specifically upregulated genes in *nla* under 2B vs WT-C


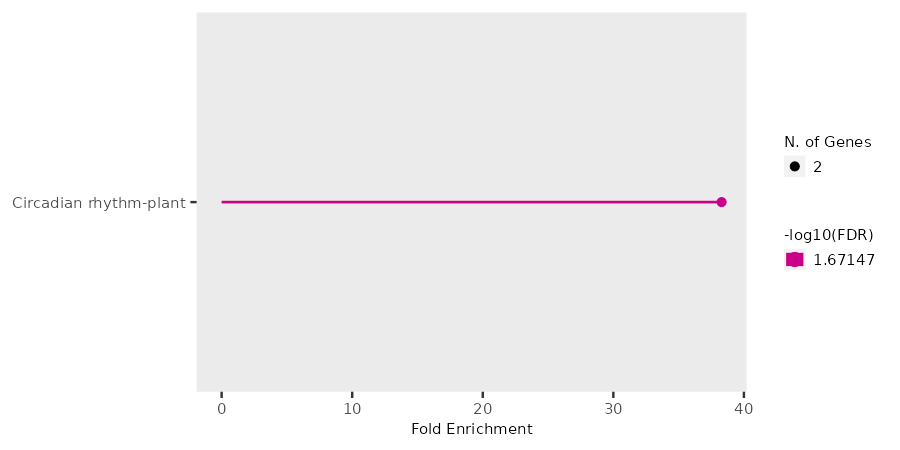


Figure S37. KEGG enrichment analysis of 38 specifically upregulated genes in *nla* under 2B vs nla-C


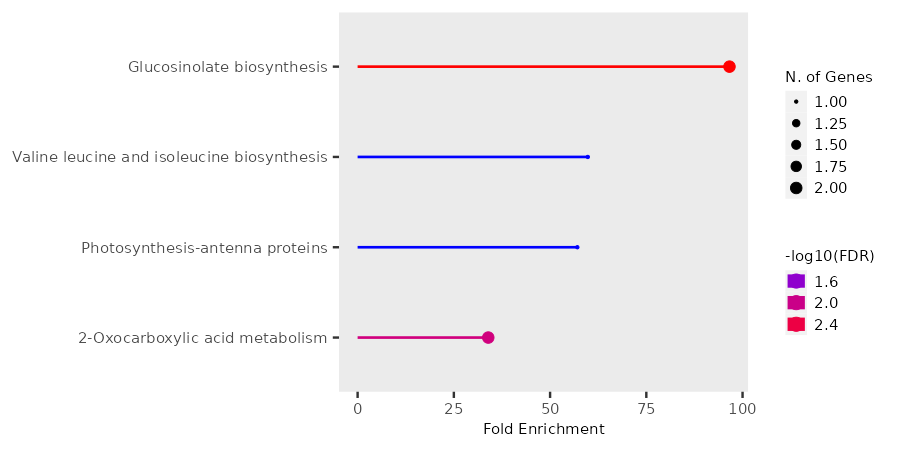


Figure S38. KEGG enrichment analysis of 22 commonly downregulated genes between *nla* under B toxicity vs WT-C and *nla* under B toxicity vs nla-C


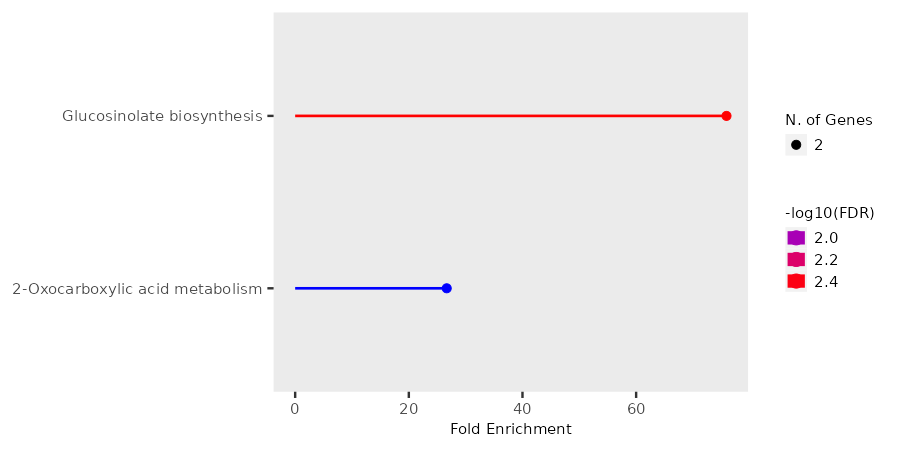


Figure S39. KEGG enrichment analysis of 28 commonly downregulated genes between *nla* under 1B vs WT-C and *nla* under 1B vs nla-C


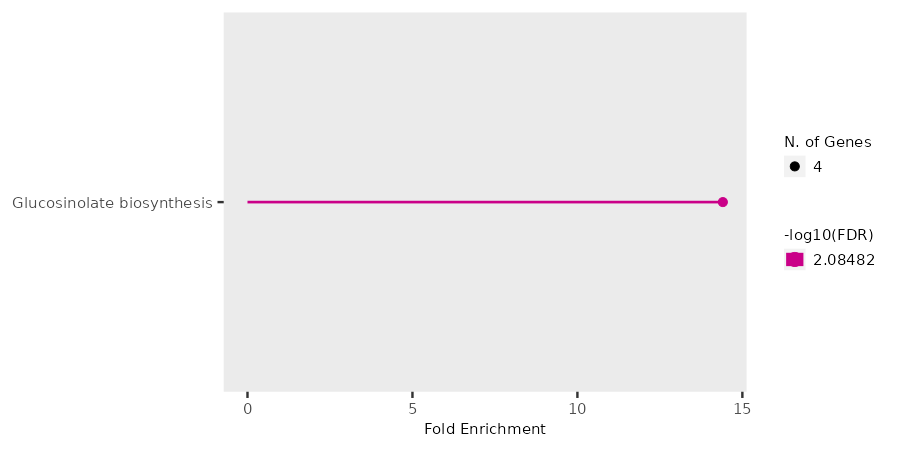


Figure S40. KEGG enrichment analysis of 299 specifically downregulated genes in *nla* under 1B vs WT-C


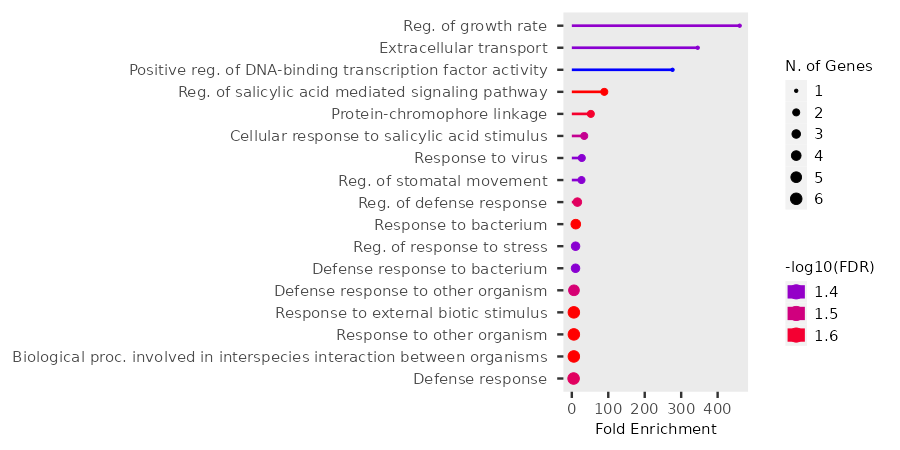


Figure S41. GO Biological Process analysis of 21 specifically downregulated genes in *nla* under 1B vs nla-C (too few genes for KEGG).


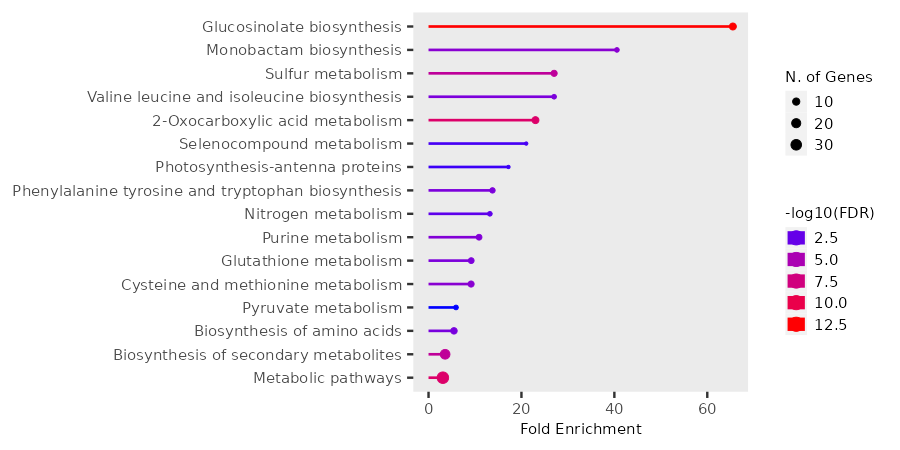


Figure S42. KEGG enrichment analysis of 147 commonly downregulated genes between *nla* under 2B vs WT-C and *nla* under 2B vs nla-C


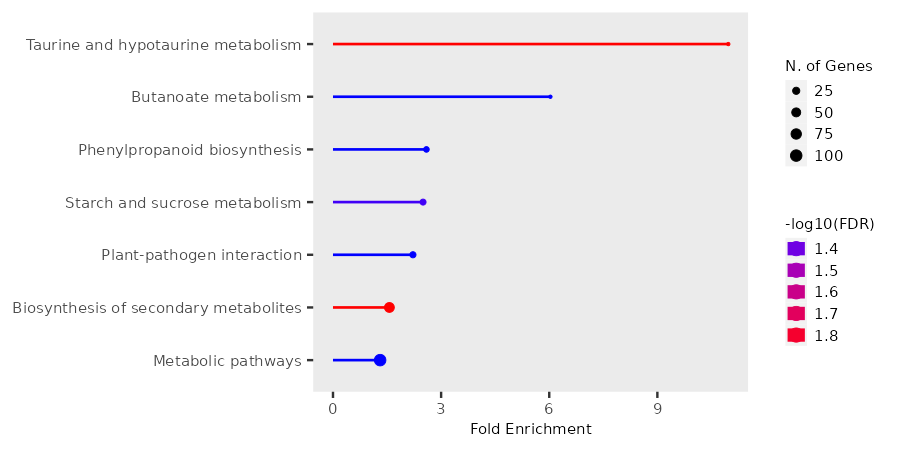


Figure S43. KEGG enrichment analysis of 945 specifically downregulated genes in *nla* under 2B vs WT-C


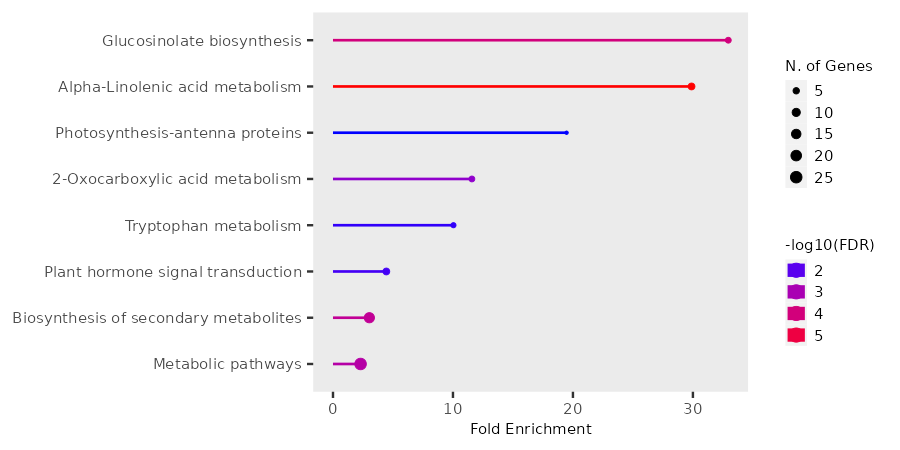


Figure S44. KEGG enrichment analysis of 129 specifically downregulated genes in *nla* under 2B vs nla-C


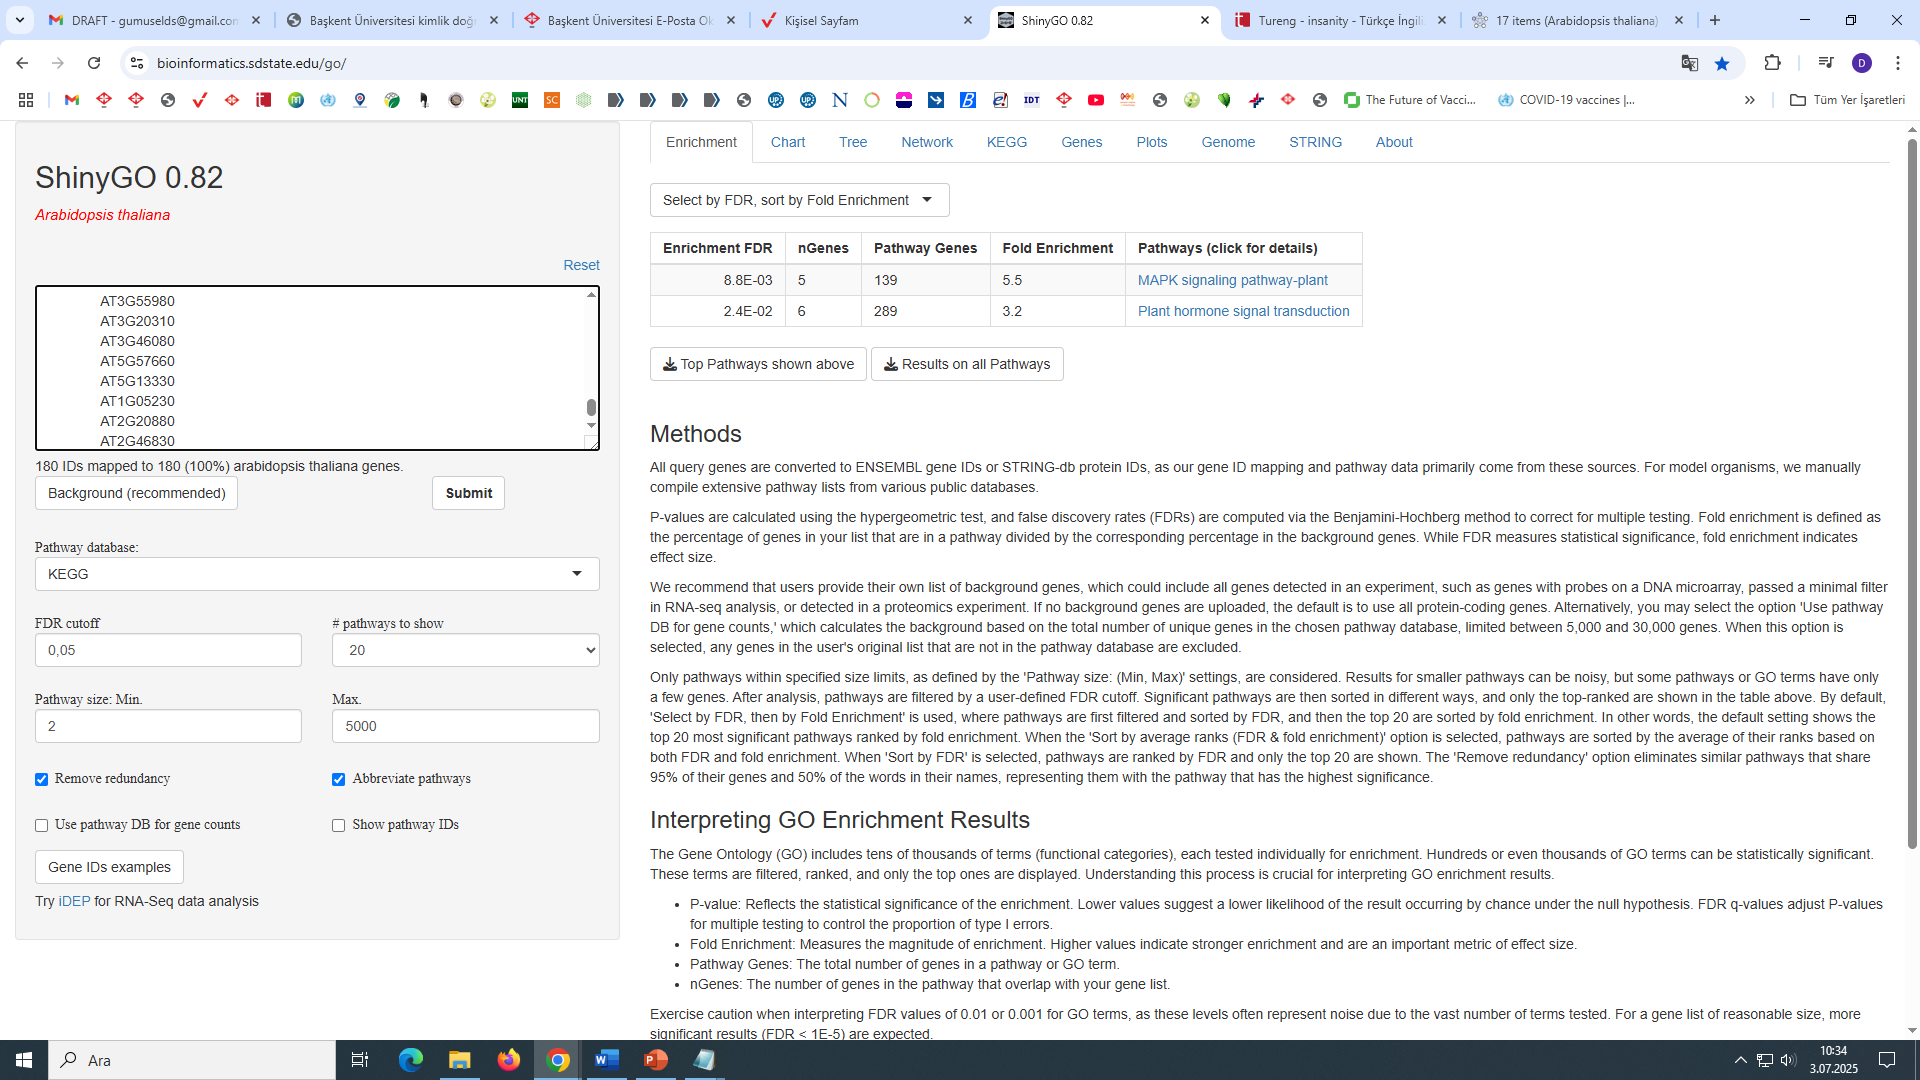


Figure S45: KEGG enrichment analysis of 180 downregulated TFs in *nla* under C condition compared to WT-C


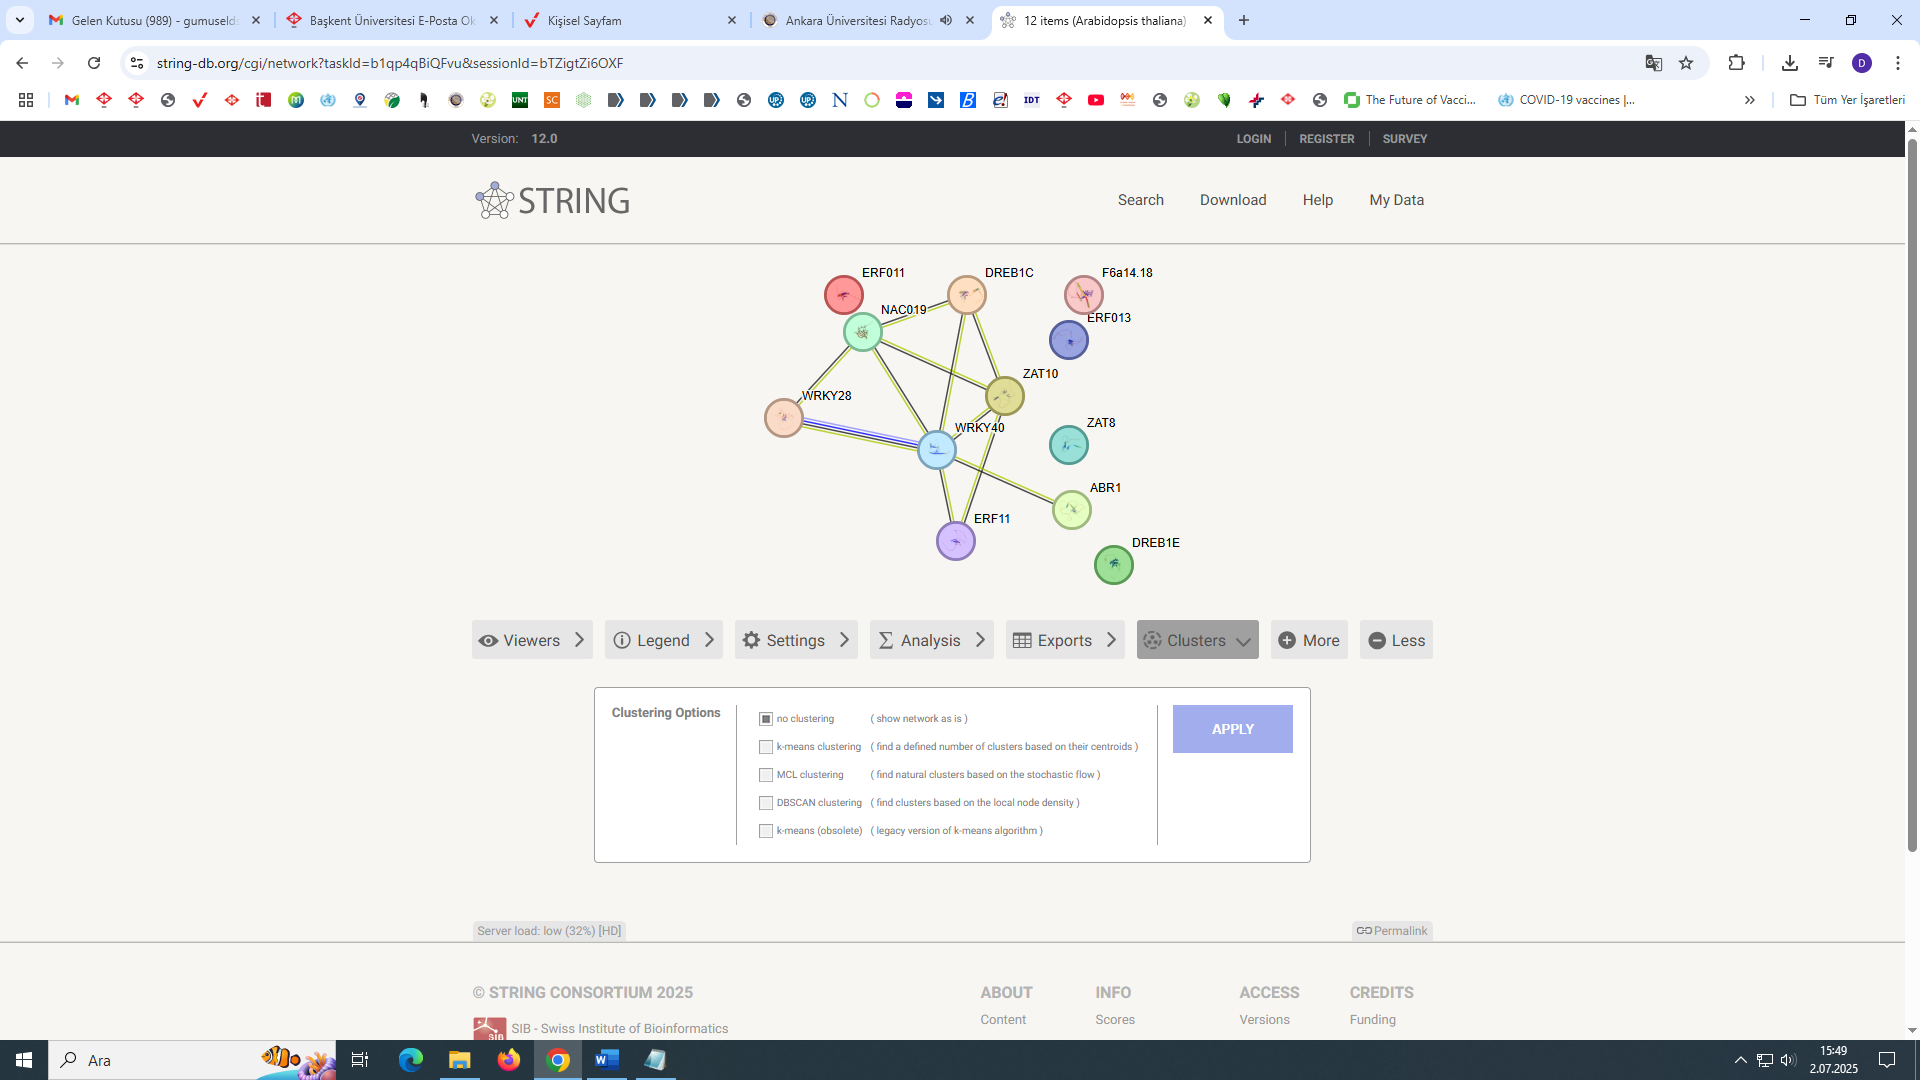


Figure S46. STRING analysis of upregulated 12 TFs in *nla* under 1B compared to nla-C


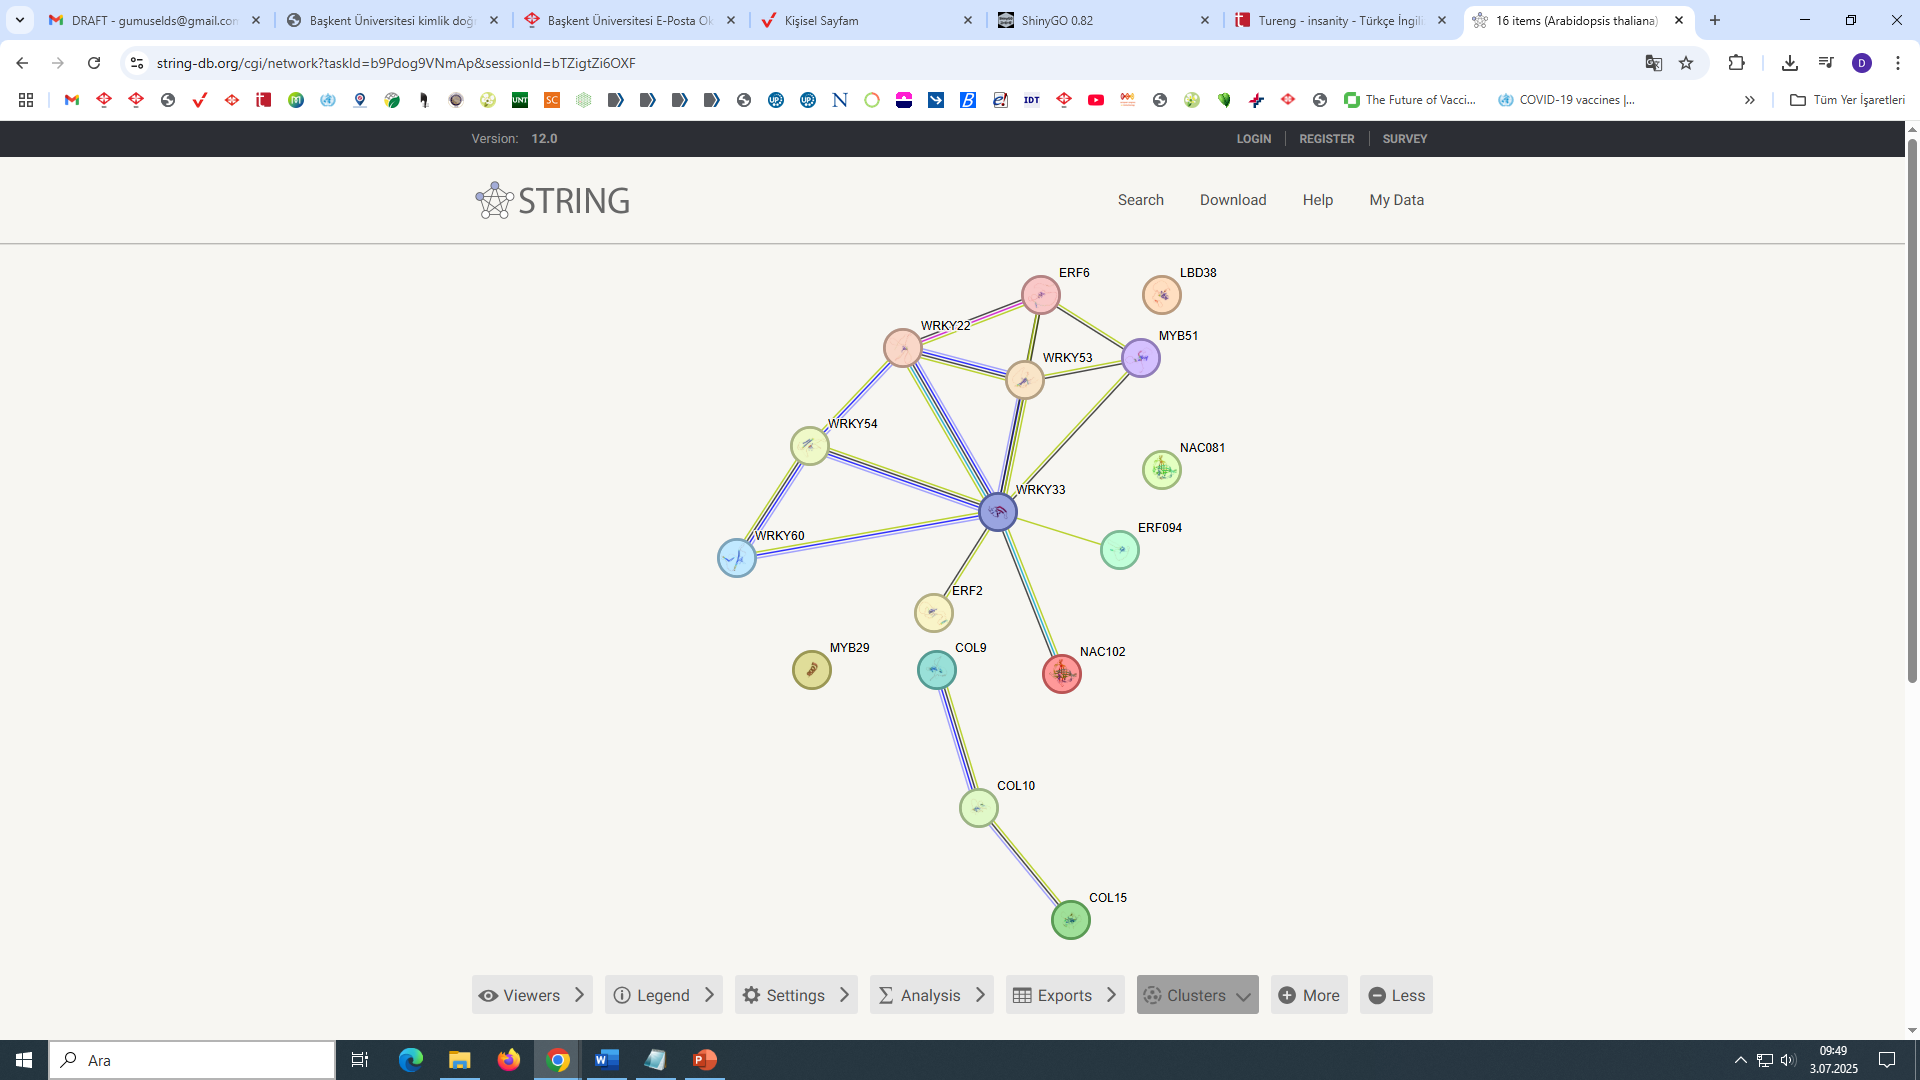


Figure S47. STRING analysis of downregulated 16 TFs in *nla* under 2B compared to nla-C


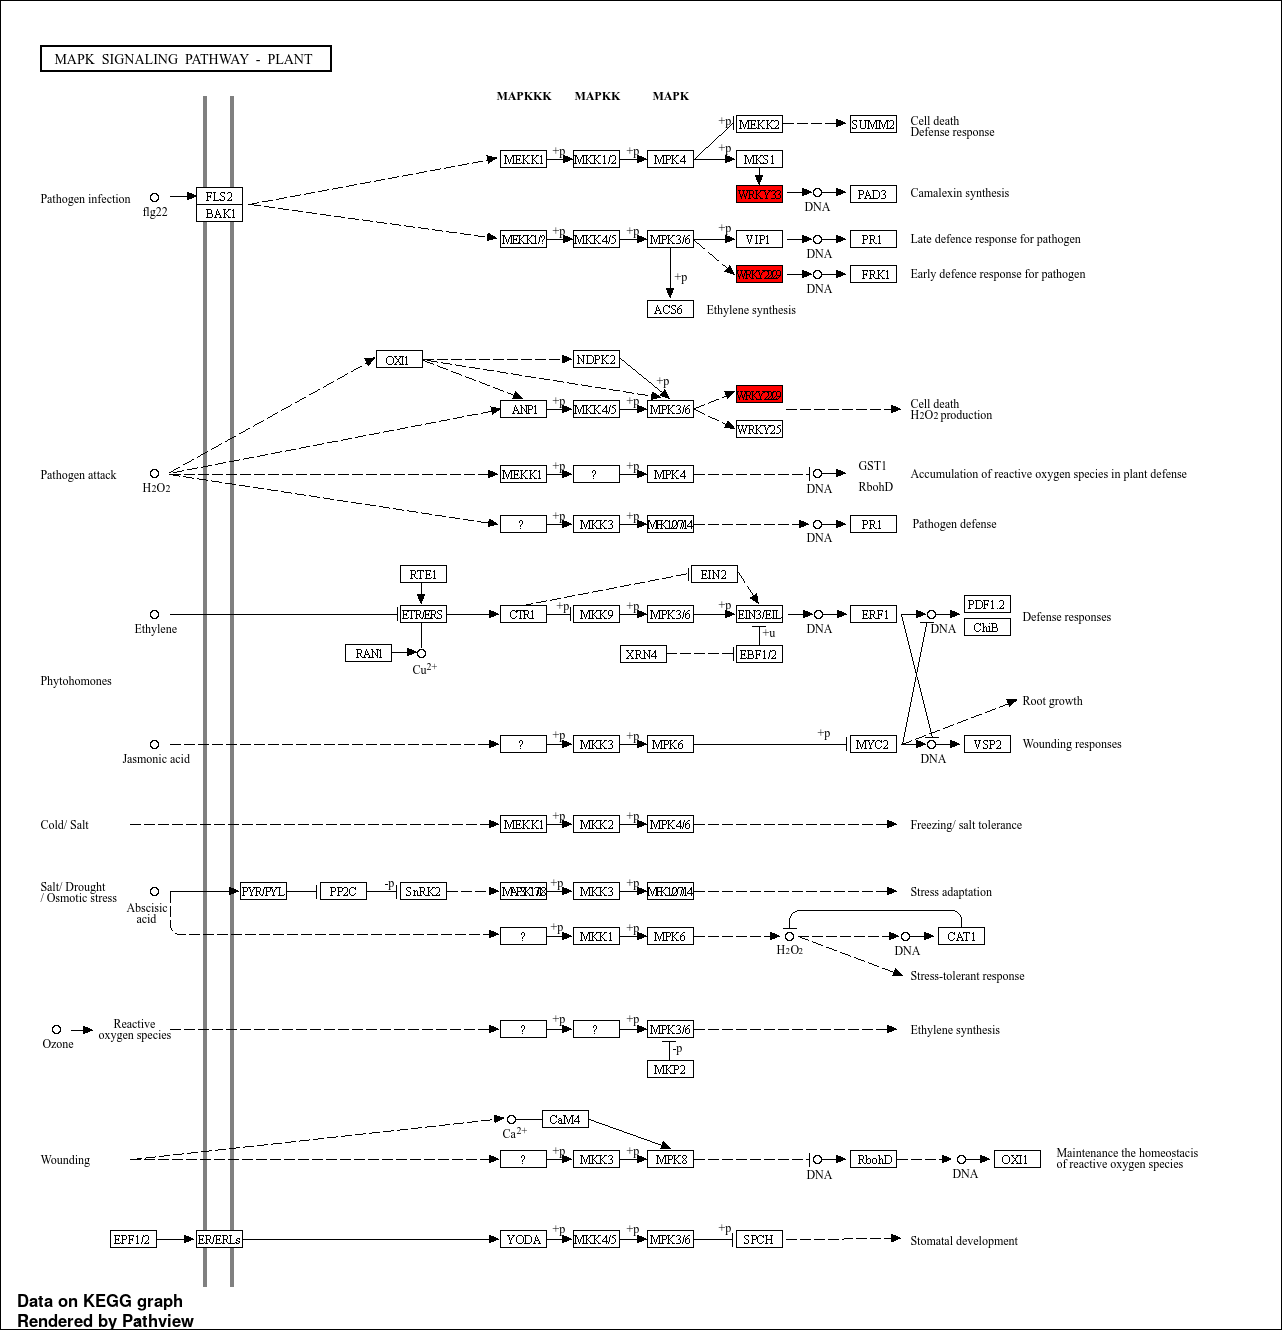


Figure S48. Downregulated TFs in MAPK signaling pathway-plant in *nla* under 2B compared to nla-C


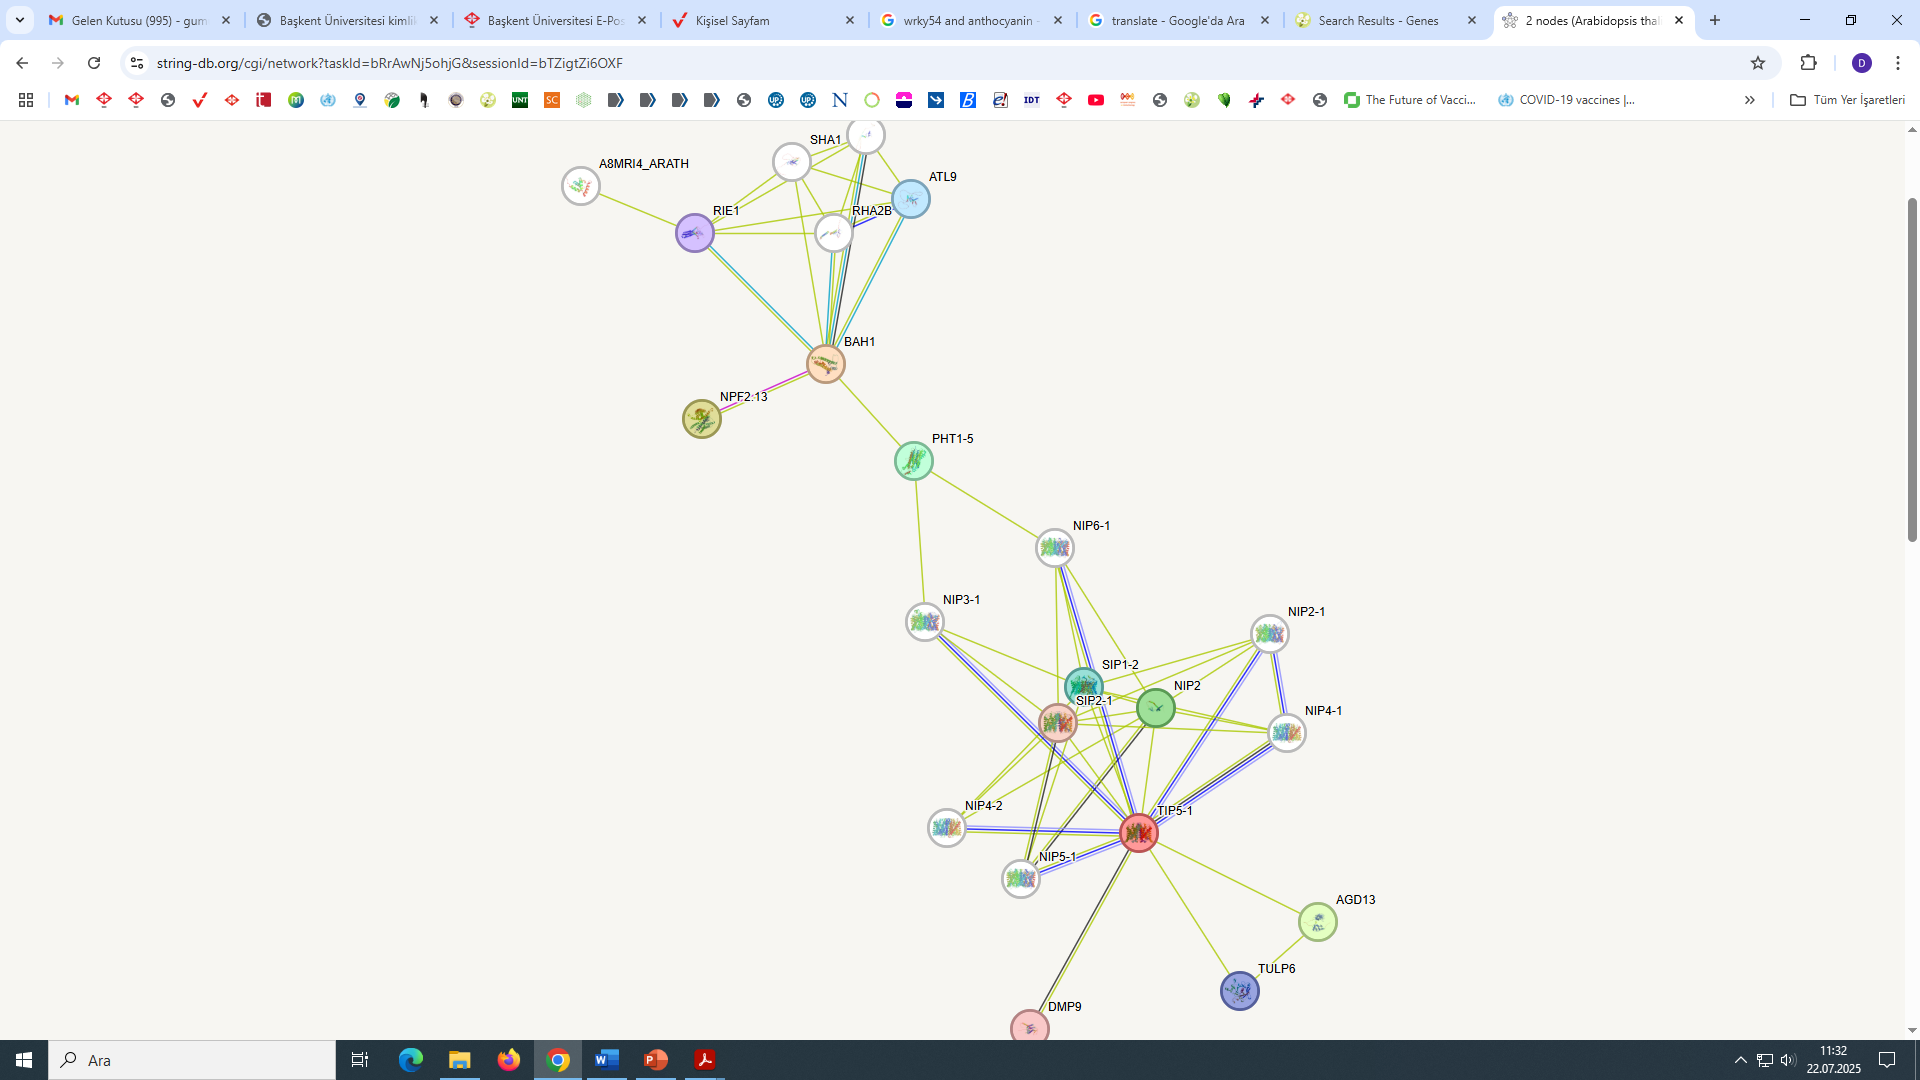


Figure S49. STRING analysis for NLA (represented by BAH1) and AtTIP5
